1

2

## Competition among *Aedes aegypti* larvae

3

4

5 Kurt Steinwascher

6

7

8

9 Formerly of the Florida Medical Entomology Laboratory, 200 9<sup>th</sup> St SE, Vero Beach, FL 32962

10 Present address: 12700 Lake Ave #2512, Lakewood OH 44107

11 E-mail: [kurtfsteinwascher@gmail.com](mailto:kurtfsteinwascher@gmail.com)

12

## 13 Abstract

14 Adult *Aedes aegypti* mosquitoes are important vectors of human disease. The size of the adult female  
15 affects her success, fitness, and ability to transmit diseases. The size of the adults is determined during  
16 the aquatic larval stage. Competition among larvae for food influences the size of the pupa and thus the  
17 adult. In these experiments, the food level (mg/larva) and the density (larvae/vial) both affect  
18 intraspecific competition, which shows up as the interaction of the two factors. Furthermore, the total  
19 food per vial affects the nature of competition among the larvae, also apparent in the interaction of  
20 food and density. Male larvae are affected by the percent of males in the vial, but females are not.  
21 Seven biologically significant dependent variables were examined, and the data analyzed by multivariate  
22 analysis of variance to gain insight into the relationships among the variables and the effects of these  
23 factors on the larvae as they grew in small containers. Male and female larvae compete differently from  
24 one another for the particulate yeast cells in this experiment; female larvae outcompete males through  
25 larger size and by retaining cells within their gut at low total food levels. Under conditions of more  
26 intense competition, the pupal masses of both males and females are smaller, so the effect of  
27 competition is a reduced apparent food level. The age at pupation is also affected by food and density.  
28 Across the twenty treatment combinations of food/larva and larvae/vial, female larvae grew as though  
29 there were six different ecological environments while male larvae grew as though there were only four  
30 different environments. No interference competition was observed. Eradication efforts aimed at adult  
31 populations of this mosquito may inadvertently increase the size and robustness of the next generation  
32 of larvae, resulting in a subsequent adult population increase in the second generation.

33

## 34 Keywords

35 *Aedes aegypti*, age at pupation, ANOVA, competition, exploitative, female advantage, filter feeding,  
36 food x density, growth rate, interference, larval density, larval development, life history, MANOVA,  
37 multivariate analysis of variance, positive feedback effect, pupal mass, pupation, pupation triggers, sex  
38 ratio, size distribution, survival

39

## 40 Introduction

41 The *Aedes aegypti* mosquito is a global vector of human diseases, including Yellow Fever, Dengue and  
42 Zika. Its impact on human health is through the bite of the adult female; the size and success of the  
43 adults are determined by environmental conditions during the larval growth phase ending at pupation  
44 [1]. *Aedes aegypti* larvae occur in nature in low numbers spread across multiple small containers [2-13],  
45 but see [14]. The mosquito larvae react to their environmental conditions including food level  
46 (food/larva), total food (food/container), and density (larvae/container) differently depending on  
47 gender. Notwithstanding decades of study, including research aimed at developing eradication methods  
48 for these and other mosquito species, little is known about the mechanisms by which these larvae  
49 interact and compete in the juvenile stages during which they are confined to small containers with  
50 limited food resources. Part of the effect of larval density on competition shows up as an apparent  
51 change in the food level for mosquitoes [2,6,15-27] and other organisms [28–31]. Investigation of such  
52 interactions between food level and density leads to an understanding of the processes underlying the  
53 competition among individuals [29–31]. The two sexes of *A. aegypti* respond differently to food level  
54 and density [2,4,15-17,19-21,32-39]. Sex differences in the joint effects of food and density suggest that  
55 males and females compete for food differently. The experiments in this study explore the response of  
56 male and female larvae to different combinations of initial food level, density and the percent of males

57 in each vial. They differ from prior experiments because seven biologically significant dependent  
58 variables were measured and analyzed in a single MANOVA, allowing insight into the relationships  
59 among the variables as well as the effects of the treatments and most importantly the interactions  
60 across the treatments.

61

## 62 Methods

63 Eggs were obtained from a colony of *A. aegypti* after feeding females on a mouse. The colony had been  
64 started two generations previously with larvae and pupae collected from tires near Dade County Public  
65 Works Department (Florida). This research was conducted according to the standard guidelines at the  
66 time (1979-1982), sanctioned by the NIH, and under the supervision of the appropriate personnel at the  
67 Florida Medical Entomology Laboratory (IFAS and the University of Florida at Gainesville).

68

69 The food x density experiment investigated the effects of food and density on mosquito larval growth at  
70 four different Food levels and five Densities. Numbered, flat-bottomed, shell vials were filled with 20 ml  
71 distilled water containing a concentration of baker's yeast to produce the Food level treatments.  
72 Food levels in the experiment were chosen to span the region where exploitative competition is  
73 important: 2 mg, 3 mg, 4 mg, and 5 mg of yeast per larva [17,40–47]. Two hours after eggs were  
74 immersed in distilled water, larvae were counted into the numbered shell vials to produce densities of  
75 four, five, six, seven, or eight larvae per vial. Five replicates of the twenty density and food level  
76 treatments were initiated. Vials were arranged in a randomized sequence, then left in a room at  
77 ambient temperatures (18° C to 33° C). Vials were examined for pupae daily from the fourth day  
78 through the thirty-seventh day when the last larva died. Pupae were removed from the treatment vial

79 by dropper, blotted on paper toweling, weighed to the nearest 0.01 mg and then identified by sex with a  
80 stereo microscope at 10 X magnification.

81

82 The sex ratio experiment examined the effect of the percent males and food level on mosquito larval  
83 growth to understand competitive interactions between the sexes. Treatment conditions were selected  
84 so that survival would be high; vials with less than full survivorship cannot be assigned a sex ratio, nor do  
85 they fit a food/larva category, consequently, data from those vials were discarded. Larvae were reared  
86 at two densities, five or six larvae per vial, and at two food levels, 3 or 4 mg yeast per larva. Forty  
87 replicates of each of the four treatments were initiated. The two densities produced 9 possible mixed-  
88 sex ratios at two food levels. The vials were placed in an insectary at 26° C and 12/12 light/dark cycle for  
89 the first four days and overnight thereafter. With this exception, handling was identical to the first  
90 experiment.

91

92 The endpoint of both experiments for each individual larva was either pupation, or death. The endpoint  
93 of each treatment vial was the last pupation or the death of the last larva. Seven variables were  
94 calculated for each replicated vial of each treatment. These variables were: % survival, mass and age of  
95 the Prime male at pupation, Average mass of males at pupation, mass and age of the Prime female at  
96 pupation, and Average mass of females at pupation. In each vial, one male and one female were  
97 designated as Prime individuals; within that vial each had the greatest expectation of reproductive  
98 success for its sex [1]. The Prime individuals, through chance, inherent ability or a combination, appear  
99 to be the most successful at larval competition. Because the relationship between pupal mass and age  
100 at pupation and adult success differed for the two sexes, the definition of the Prime individual must  
101 differ across sexes also. The Prime male was the male with the greatest growth rate (the first male to  
102 pupate or the largest of the males pupating on the first day of pupation). For males, an early age at

103 pupation may confer as large an advantage as an increased mass [1]. The Prime female was the largest  
104 female to pupate; age is not as important to the success of female, but mass is directly related to  
105 fecundity [1]. To compare the growth rates of the Prime individuals, mass and age at pupation were  
106 recorded for both sexes. Growth rates are an important indicator of the outcome of exploitative  
107 competition among mosquito larvae and other filter feeders [31,48–53], and have been used extensively  
108 to score the outcome of intraspecific and interspecific competition among mosquito larvae  
109 [1,20,21,26,37,54-63].

110

111 Percent survival was calculated to compare the lethal effects of competition among the various  
112 treatments and to estimate the relative importance of these lethal effects on the non-lethal changes in  
113 mass and age relationships. Data from vials which produced pupae of only one sex were not used in the  
114 analysis and this accounts for the variation in sample size among treatments in the food x density  
115 experiment. [S1 Table.]

116

117 The seven variables were analyzed as a multivariate data set using a two-way analysis of variance design  
118 by the program, UNCPROG MANOVA (at the Triangle Universities Computation Center), which  
119 accommodates unequal sample sizes. See [64,65]; for a discussion of multivariate analysis of variance.

120

## 121 Results

### 122 The food x density experiment

123 The data were analyzed by MANOVA. The individual ANOVA tables were a product of the MANOVA  
124 analysis and these were used to further investigate the significant relationships among the 7 dependent  
125 variables and across the 9 significant contrasts.

### 126 Multivariate analysis (MANOVA)

127 The multivariate analysis of the treatment effects and interactions across the seven biologically  
128 significant dependent variables should identify the way that competition changes as the initial density  
129 and food level vary. For the 9 significant MANOVA contrasts, the correlations between the discriminant  
130 function scores and variables [64,65], the R squared values, and the multivariate significance levels are  
131 shown in Table 1. The magnitude and sign of the correlations in Table 1 indicate the contribution of  
132 each univariate comparison to the significant MANOVA relationship. In the same way that the r squared  
133 values guide the selection of the most important contrasts in univariate analyses, the R squared values  
134 indicate the relative importance of the multivariate contrasts. There are nine MANOVA contrasts with R  
135 squared values greater than 0.60; the remainder are 0.36 or lower. These are distributed across the  
136 food level contrasts, the density contrasts and three of the interactions. [S2 Table shows all 19  
137 individual contrasts.]

138

139 Table 1. Correlations between composite scores and variables with MANOVA significance levels and R  
 140 squared for the 9 most significant contrasts.

| Contrast (one DF for each)                    | Survival | Prime male mass at pupation | Prime male age at pupation | Average male mass at pupation | Prime female mass at pupation | Prime female age at pupation | Average female mass at pupation | MANOVA P< | R squared |
|-----------------------------------------------|----------|-----------------------------|----------------------------|-------------------------------|-------------------------------|------------------------------|---------------------------------|-----------|-----------|
| <b>FOOD LEVEL (mg per larva per vial)</b>     |          |                             |                            |                               |                               |                              |                                 |           |           |
| <b>F1: (2 mg + 3 mg) vs (4 mg + 5 mg)</b>     |          | 0.53                        |                            | 0.61                          | 0.77                          |                              | 0.71                            | 0.001     | 0.92      |
| <b>F2: (2 mg + 4 mg) vs (3 mg + 5 mg)</b>     |          | 0.59                        | 0.28                       | 0.69                          | 0.69                          |                              | 0.64                            | 0.001     | 0.86      |
| <b>F3: (2 mg + 5 mg) vs (3 mg + 4 mg)</b>     | 0.36     | 0.62                        |                            | 0.64                          | 0.63                          |                              | 0.53                            | 0.001     | 0.84      |
| <b>DENSITY (larvae per vial)</b>              |          |                             |                            |                               |                               |                              |                                 |           |           |
| <b>D2: 7 larvae vs 8 larvae</b>               |          | 0.70                        | 0.43                       | 0.67                          | 0.39                          | 0.30                         | 0.39                            | 0.001     | 0.68      |
| <b>D3: (4 + 5 larvae) vs (7 + 8 larvae)</b>   |          | 0.73                        | 0.39                       | 0.57                          | 0.59                          | 0.37                         | 0.48                            | 0.001     | 0.64      |
| <b>D4: 6 larvae vs (4 + 5 + 7 + 8 larvae)</b> |          | 0.76                        | 0.33                       | 0.75                          | 0.57                          |                              | 0.52                            | 0.001     | 0.60      |
| <b>FOOD LEVEL X DENSITY Interactions</b>      |          |                             |                            |                               |                               |                              |                                 |           |           |
| <b>F1 X D3</b>                                | 0.25     | 0.63                        |                            | 0.72                          | 0.56                          |                              | 0.49                            | 0.001     | 0.88      |
| <b>F2 X D1</b>                                | 0.28     | 0.55                        | 0.25                       | 0.62                          | 0.62                          |                              | 0.56                            | 0.001     | 0.75      |
| <b>F2 X D3</b>                                | 0.26     | 0.66                        |                            | 0.75                          | 0.53                          |                              | 0.45                            | 0.001     | 0.75      |

141  
 142 There are two patterns apparent from examining Table 1; there are few significant correlations for  
 143 either Survival, or the Prime female age at pupation, and the correlations that are present are  
 144 numerically low. Survival and Prime female age at pupation are not affected by the treatments as much  
 145 as the other dependent variables within the MANOVA.

## 146 MANOVA—food level

147 Three of the four highest R squared values are associated with the food level contrasts, F1, F2, and F3. It  
 148 is not surprising that food level is significant, but there are two patterns within these numbers that are  
 149 striking. First, food level has no correlation with the Prime female age at pupation and almost no  
 150 correlation with the Prime male age at pupation or Survival. Second, the correlations with the mass  
 151 variables are all positive, so increased food per larva increases all the mass variables, with notable



152 differences between the two sexes. The Prime female mass has a higher correlation to the food level  
153 treatments than the Average female mass, but the Prime male mass has a lower correlation to the food  
154 level treatment than the Average male mass. In F1, the contrast with the highest R squared in the table  
155 (.92), and the easy-to-understand comparison between the two lower food levels and the two higher  
156 food levels, the Prime female mass correlation is 0.77, while the Average female mass correlation is  
157 0.71, and the corresponding correlations for Prime and Average male masses are 0.53 and 0.61.  
158 Increased food per larva affects the Prime female more than the Average female, and all females more  
159 than the males. However, increased food per larva affects the Average male mass more than it does the  
160 Prime male.

## 161 MANOVA—density

162 Density has no impact on Survival; there are no significant correlations for Survival against any of the  
163 density contrasts. Three of the density contrasts, D2, D3, and D4, have high R squared values. D1, the  
164 comparison between 4 larvae per vial and 5 larvae per vial, is not significant in the MANOVA, so there is  
165 effectively no difference between these two density treatments. For the three other density contrasts,  
166 the correlations are all positive; increased density increases the mass variables and to a lesser extent the  
167 age at pupation variables. In these contrasts, the Prime male mass at pupation has the largest  
168 correlation (0.70, 0.73, 0.76, respectively) with similar scores for the Average male mass. The  
169 correlations for the Prime female and Average female masses are lower and in some cases, much lower.  
170 Increased density has a larger effect on males than on females (for both mass and age at pupation).  
171 According to this multivariate analysis, increases in food level and density both increase the mass at  
172 pupation of mosquito larvae. Females are affected by food level more than males and males are  
173 affected by density more than females. Increased density increases Age at pupation for males and  
174 females, but food level has almost no effect.

## 175 MANOVA—interactions

176 Interactions between the two main treatments indicate that the observed results are higher or lower  
177 than would be expected based on the effects of the main treatments. The interaction with the highest R  
178 squared value (0.88) is F1 X D3, where F1 is the contrast between the two lowest food levels against the  
179 two highest food levels, and D3 is the contrast between the two lowest densities against the two highest  
180 densities. This interaction does have a correlation with survival, although it is small (0.25). The  
181 interaction does not have a correlation with either the Prime male age at pupation or the Prime female  
182 age at pupation. The four mass variables show large positive correlations with this interaction; the  
183 Average male mass has the highest (0.72) followed by the Prime male mass (0.63), the Prime female  
184 mass (0.56) and the Average female mass (0.49). This interaction affects males more than females, and  
185 the Average male mass more than the Prime male mass, but Prime female mass more than Average  
186 female mass. The four cells of this contrast represent the most extreme competition (the two lowest  
187 food levels with the two highest densities), the least extreme competition (the two highest food levels  
188 with the two lowest densities), the highest total food per vial (the two highest food levels with the two  
189 highest densities) and the lowest total food per vial (the two lowest food levels with the two lowest  
190 densities). The significance of this interaction indicates that either competition, or total food per vial, or  
191 both influence the growth of the larvae in the microcosms.

192 The other two interactions with high R squared values (both 0.75) are F2 X D1 and F2 X D3, where F2 is  
193 [(2 mg/larva + 4 mg/larva) vs (3 mg/larva + 5 mg/larva)], D1 is the contrast between 4 larvae and 5  
194 larvae, and D3 is the contrast between the two lowest densities and the two highest densities, as  
195 before. Both interactions have small correlations with survival (0.28 and 0.26). Neither interaction has  
196 a correlation with Prime female age at pupation and only F2 X D1 has a small correlation with Prime  
197 male age at pupation. However, both interactions have similar significant correlation with the four mass  
198 variables as the F1 X D3 interaction above. For F2 X D1, the correlation for the Average male mass (0.62)

199 is greater than the Prime male mass (0.55) and that of the Prime female mass (0.62) is greater than that  
200 of the Average female mass (0.56). For F2 X D3, the correlation for the Average male mass (0.75) is also  
201 greater than the Prime male mass (0.66) and that of the Prime female mass (0.53) is similarly greater  
202 than that of the Average female mass (0.45).

203 According to the multivariate interactions, males (mass variables) are affected more by the interactions  
204 than females and the Average male is affected more than the Prime male. However, the Prime female is  
205 affected more by the interactions than the Average female. In the food x density experiment, the  
206 MANOVA correlations for the main food level contrasts show one pattern, the correlations for the main  
207 density contrasts show a separate pattern, and the three significant interactions show a third pattern.  
208 To understand what these significant interactions mean to the biology of *Aedes aegypti*, we need to  
209 examine the contrasts in the univariate analyses.

## 210 MANOVA summary

211 There are four different patterns for the seven dependent variables across the treatment contrasts. All  
212 the mass variables have significant positive correlations with the main treatments and with the three  
213 significant interactions. Food level and density both affect the mass of the larvae, but the significant  
214 interactions suggest that the effect of density may be through differences in the amount of food  
215 available (total food per vial) or through competitive interactions or both, so we can't tell the magnitude  
216 of independent effects of food level and density on the growth of the larvae.

217

218 The second pattern is for the Prime female age at pupation. The only significant contrasts for which this  
219 variable had a correlation in the MANOVA were two associated with density. For Prime female age at  
220 pupation, there is an independent effect of density; higher density increases the age at pupation for the  
221 Prime female, but none of the food level treatments or interactions affect it.

222

223 The third pattern is for the Prime male age at pupation. It is affected by food level, density and the  
224 interactions, but it appears to be much more strongly affected by density than by either food level or  
225 the interactions. This suggests that there is an independent effect of density on the Prime male age at  
226 pupation, and a smaller effect of food level that interacts with density at the lowest densities (D1: 4  
227 larvae vs 5 larvae). Different factors determine the male age at pupation than those that determine the  
228 female age at pupation.

229

230 The fourth pattern is for Survival. This variable is affected by food level and by the interactions, but not  
231 by the main density treatment. This suggests that part of the effect of food level on Survival is mediated  
232 by the total food per vial.

### 233 Univariate analyses—ANOVAs

234 Table 2 presents the r squared values for each dependent variable summed across each of the main  
235 treatments and all the interactions. The last row of Table 2 shows the total r squared for each of the  
236 seven variables. These range from 0.46 (Prime female age at pupation) to 0.94 (both Average male mass  
237 and Average female mass). What is noteworthy here is that the variation in Prime female age at  
238 pupation is not well explained by the food level and density treatments; only 46 % of the variation in  
239 Prime female age at pupation is explained by the treatments, 54 % is due to factors not included in the  
240 experiment. More interesting is that the variation in the four mass variables is very well explained by  
241 the experimental treatments (88 %, 94 %, 93 %, and 94 %). Prime male age at pupation and Survival are  
242 in between these extremes (69 % and 63 %, respectively). [S3 Table shows the Mean Square value, the  
243 significance (P value), and the r squared value for each of the 19 contrasts and each of the seven  
244 dependent variables. This is sufficient to construct the individual ANOVAs for the dependent variables.]

245 Table 2. r squared values summed across treatments and interactions for each of the 7 dependent  
 246 variables.

| Treatments                        | DF | Survival | Prime male mass at pupation | Prime male age at pupation | Average male mass at pupation | Prime female mass at pupation | Prime female age at pupation | Average female mass at pupation |
|-----------------------------------|----|----------|-----------------------------|----------------------------|-------------------------------|-------------------------------|------------------------------|---------------------------------|
| Food Level                        | 3  | 0.30     | 0.41                        | 0.21                       | 0.47                          | 0.64                          | 0.12                         | 0.64                            |
| Density                           | 4  | 0.00     | 0.16                        | 0.21                       | 0.12                          | 0.06                          | 0.20                         | 0.08                            |
| Food Level X Density Interactions | 12 | 0.33     | 0.31                        | 0.27                       | 0.35                          | 0.23                          | 0.14                         | 0.22                            |
| Totals                            | 19 | 0.63     | 0.88                        | 0.69                       | 0.94                          | 0.93                          | 0.46                         | 0.94                            |

  

| Treatments                        | DF | Survival | Prime male mass at pupation | Prime male age at pupation | Average male mass at pupation | Prime female mass at pupation | Prime female age at pupation | Average female mass at pupation |
|-----------------------------------|----|----------|-----------------------------|----------------------------|-------------------------------|-------------------------------|------------------------------|---------------------------------|
| Food Level                        | 3  | 0.30     | 0.41                        | 0.21                       | 0.47                          | 0.64                          | 0.12                         | 0.64                            |
| Density                           | 4  | 0.00     | 0.16                        | 0.21                       | 0.12                          | 0.06                          | 0.20                         | 0.08                            |
| Food Level X Density Interactions | 12 | 0.33     | 0.31                        | 0.27                       | 0.35                          | 0.23                          | 0.14                         | 0.22                            |
| Totals                            | 19 | 0.63     | 0.88                        | 0.69                       | 0.94                          | 0.93                          | 0.46                         | 0.94                            |

247

## 248 ANOVAs—food level

249 The treatments food level and density are expected to have significant effects on these variables based  
 250 on prior experiments. The treatment conditions were selected to produce different levels of non-lethal  
 251 competition. The MANOVA indicated that there were differences in the way that the dependent  
 252 variables responded to the treatments and interactions. We see in Table 2, that food level alone  
 253 accounts for 30 % of the variation in Survival, more than 40 % of the variation in the two male mass  
 254 variables and 64 % of the variation in the two female mass variables. Females (mass variables) are much  
 255 more affected by food level than are males. While food level explains the same amount of variation in  
 256 the two female mass variables (64 %), it accounts for more of the variation in Average male mass (47 %)  
 257 than in the Prime male mass (41 %). In contrast to the large effect on the female mass variables and the

258 male mass variables, food level accounts for only 12 % of the variation in Prime female age at pupation,  
259 and 21 % of Prime male age at pupation.

260

261 Survival is higher at the intermediate food levels (3 mg/larva, 4 mg/larva) than at the highest (5  
262 mg/larva) or lowest (2 mg/larva) [S4 Table]. This is likely the reason for the low correlation for Survival  
263 against food level in the MANOVA. [Contrast F3: (2 mg/larva + 5 mg/larva) vs (3 mg/ larva + 4 mg/larva)  
264 is the only significant correlation for Survival against food level in the MANOVA.]

265

266 The Prime female mass at pupation, the Average female mass at pupation, the Prime male mass at  
267 pupation and the Average male mass at pupation all increase with increasing food/larva [S5 Table, S6  
268 Table, S7 Table, S8 Table]. The effect of Food level on these mass variables is consistent with the  
269 relationships described by the correlations in the MANOVA.

270

271 The Prime male age at pupation is highest at the highest food/larva treatment; the other food level  
272 treatments are lower, but similar to each other [S9 Table]. The Prime female age at pupation is highest  
273 at the highest food/larva treatment and lowest at the next highest food/larva treatment (4 mg/larva)  
274 [S10 Table]. Neither of the age at pupation variables had large correlations with food level in the  
275 MANOVA.

276

## 277 ANOVAs—density

278 The next row in Table 2 shows the contribution of the density treatments to the total r squared values.

279 The highest r squared values are for the Prime male age at pupation (21 %) and the Prime female age at  
280 pupation (20 %). Density affects the male mass variables (16 %, 12 %) more than the female mass  
281 variables (6 %, 8 %); and affects the sexes differently. Density explains more of the variation in the

282 Prime male mass than in the Average male mass, but explains more of the variation in the Average  
283 female mass than in the Prime female mass.

284

285 Survival is unaffected by density ( $r^2 = 0.00$ ). This is consistent with the zero correlation with  
286 density observed in the MANOVA result.

287

288 The Prime male age at pupation is highest at the highest density; the lower densities are similar in age at  
289 pupation [S9 Table]. The Prime female age at pupation is also highest at the highest density; the lower  
290 densities vary, but with no obvious pattern [S10 Table]. This may be the (lack of) pattern that resulted in  
291 the low positive correlations for age at pupation with density in the MANOVA.

292

293 Prime male mass at pupation is highest at the highest Density and similar at lower densities [S7 Table].  
294 Average male mass at pupation is highest at the lowest Density and similar at higher densities [S8  
295 Table]. Prime female mass at pupation increases from the lowest density to the second highest density,  
296 but then is lowest at the highest density [S5 Table]. Average female mass at pupation is lowest at the  
297 highest density, and the middle density (6 larvae/vial), but similar in the other density treatments [S6  
298 Table]. There is no uniform effect of density across the different mass variables. All the mass variables  
299 had significant interactions between food level and density in the MANOVA, so the effect of density on  
300 the mass variables may be mediated by total food per vial, competition or both.

301

302 The ANOVA reveals the effect of treatments on the individual variables, while the MANOVA reveals the  
303 relationships among the variables for each of the contrasts. The MANOVA indicated that the density  
304 treatments affected the male mass variables more than the female mass variables. The ANOVA  
305 reflected that result as well.

306

307 The MANOVA indicated that density affected Prime male mass more than Prime male age at pupation,  
308 but the ANOVA explained the Prime male age at pupation more than the Prime male mass. The  
309 observed result for females is similar. There is a component of the age at pupation in the ANOVA that is  
310 independent of the Density treatment correlations calculated by the MANOVA.

311

## 312 ANOVAs—interactions

313 The third row in Table 2 shows the contribution of the food level X density interactions to the r squared  
314 values. More than half of the contribution to the Survival r squared total is due to the interactions (33  
315 %). Interactions explain more than 30 % of the variation in the male mass variables and more than 20 %  
316 of the variation in the female mass variables. Interactions explain more of the variation in Prime male  
317 age at pupation (27 %) than in Prime female age at pupation (14 %).

318

319 In Table 3 the single degree of freedom interaction contrasts with the largest r squared values are the  
320 same contrasts that were identified in the MANOVA: F1 X D3, F2 X D1, and F2 X D3. These three  
321 contrasts account for most of the r squared value in the overall Food level X Density interactions (Table  
322 3, last row, Totals, compared to Table 2, row labelled Food level X Density Interactions). We know that  
323 both food level and density affect six of the seven dependent variables in this experiment (Table 2). The  
324 interaction between food level and density is significant when the Mean Squares are higher or lower  
325 than expected due to the main effects of food level and density separately. These patterns should help  
326 us understand the biological interactions among the larvae in the vials. As mentioned before, these  
327 three contrasts show the effects of competition and total food per vial on the growth of the larvae in the  
328 microcosms.



329 Table 3. r squared values summed across the three main interactions for each of the 7 dependent  
 330 variables.

| Food Level X Density Interaction contrasts (single DF) | DF | Survival | Prime male mass at pupation | Prime male age at pupation | Average male mass at pupation | Prime female mass at pupation | Prime female age at pupation | Average female mass at pupation |
|--------------------------------------------------------|----|----------|-----------------------------|----------------------------|-------------------------------|-------------------------------|------------------------------|---------------------------------|
| <b>F1 X D3</b>                                         | 1  | 0.13     | 0.15                        | 0.08                       | 0.17                          | 0.11                          | 0.09                         | 0.10                            |
| <b>F2 X D1</b>                                         | 1  | 0.07     | 0.05                        | 0.04                       | 0.05                          | 0.06                          |                              | 0.06                            |
| <b>F2 X D3</b>                                         | 1  | 0.06     | 0.07                        | 0.03                       | 0.09                          | 0.05                          |                              | 0.04                            |
| <b>Totals</b>                                          | 3  | 0.26     | 0.27                        | 0.15                       | 0.31                          | 0.22                          | 0.09                         | 0.20                            |

331  
 332 Tables 4-7 present the means and standard errors for the three interaction contrasts: F1 X D3, F2 X D1,  
 333 and F2 X D3. F1 compares the low food levels (2 mg/larva + 3 mg/larva) with the high food levels (4  
 334 mg/larva + 5 mg/larva) and D3 compares the low densities (4 larvae/vial + 5 larvae/vial) with the high  
 335 densities (7 larvae/vial + 8 larvae/vial). F2 compares the low food levels (2 mg/larva + 4 mg/larva) with  
 336 the high food levels (3 mg/larva + 5 mg/larva) and D1 compares 4 larvae/vial with 5 larvae/vial. The  
 337 vials with the low densities and high food levels should experience the least competition and the vials  
 338 with the high densities and low food levels should experience the most competition. The other  
 339 treatments should experience levels of competition in between the extremes, and represent the vials  
 340 with the least and most total food per vial. The value of Average male mass at pupation is highest at the  
 341 low density: high food levels treatment (the least competition) and lowest at the high density: low food  
 342 levels combination (the most competition) and intermediate at the other combinations (intermediate  
 343 levels of competition). However, none of the other variables show this pattern.

344  
 345 Another way to rank these treatments is by total food per vial (calculated by multiplying the number of  
 346 larvae per vial by the food per larvae). None of the variables line up strictly according to total food per  
 347 vial, but Prime male mass at pupation, Prime male age at pupation, Prime female mass at pupation,

348 Prime female age at pupation, and Average female mass all reach their largest value in the vials with the  
349 most food per vial.

350

351 Survival is affected by the food level treatments and the interactions, but not at all by the Density  
352 treatments (Table 2). In the interaction contrasts (Table 4), Survival is highest at the low density: high  
353 food level combinations (least competition) and lowest at the low density: low food level combinations  
354 (least total food per vial). The Survival values in the high density treatments are intermediate, but the  
355 survival is higher at the higher food level (most total food per vial). Survival is lowest at the lowest total  
356 food per vial and increases as the total food increases. This doesn't entirely explain the variation in  
357 Survival because the highest total food per vial is associated with a lower percent survival than the next  
358 highest (the treatments with the least competition). This suggests that Survival is affected by both total  
359 food per vial and competition among the larvae. In other words, at least part of the effect of density is  
360 due to the increase in total food per vial. This doesn't rule out a separate effect of density independent  
361 of food level in the interaction contrasts.

362 Table 4. Comparison of Means and (Standard Errors) for the 3 significant interactions for Survival.

| Treatment                                    |                                                                                                                                         | Survival<br>F1 X D3 | Survival<br>F2 X D1 | Survival<br>F2 X D3 |
|----------------------------------------------|-----------------------------------------------------------------------------------------------------------------------------------------|---------------------|---------------------|---------------------|
| <b>Least competition</b>                     | Low Density—D1=(4 larvae); D3=(4 larvae + 5 larvae)<br>High Food Level— F1=(4 mg/larva + 5 mg/larva);<br>F2=(3 mg/larva + 5 mg/larva)   | 1.25 (0.26)         | 1.32 (0.16)         | 1.15<br>(0.24)      |
| <b>Least food/vial</b>                       | Low Density—D1=(4 larvae); D3=(4 larvae + 5 larvae)<br>Low Food Level— F1=(2 mg/larva + 3 mg/larva);<br>F2=(2 mg/larva + 4 mg/larva)    | 0.91 (0.31)         | 0.95 (0.61)         | 1.01<br>(0.41)      |
| <b>Most food/vial</b>                        | High Density— D1=(5 larvae); D3=(7 larvae + 8 larvae)<br>High Food Level— F1=(4 mg/larva + 5 mg/larva);<br>F2=(3 mg/larva + 5 mg/larva) | 1.05 (0.35)         | 0.98 (0.16)         | 1.00<br>(0.33)      |
| <b>Most competition</b>                      | High Density— D1=(5 larvae); D3=(7 larvae + 8 larvae)<br>Low Food Level— F1=(2 mg/larva + 3 mg/larva);<br>F2=(2 mg/larva + 4 mg/larva)  | 1.03 (0.29)         | 1.07 (0.34)         | 1.08<br>(0.30)      |
| <b>r squared value;<br/>*** = P&lt;0.001</b> |                                                                                                                                         | 0.13***             | 0.07***             | 0.06***             |

363

364 Table 5 compares the two Age at pupation variables. The Prime male age at pupation is very similar  
365 across three of the four treatments (5.13 - 5.59 days), but it is much longer (5.90-6.32 days) in the  
366 treatments with the highest total food per vial. The Prime male age at pupation does not seem to be  
367 affected by competition; the vials with the least competition and those with the most competition are  
368 similar, but the vials with intermediate levels of competition and the most food per vial take the longest  
369 to pupate. This is not the same pattern for the Prime female age at pupation. First, only the F1 X D3  
370 interaction contrast is significant for this variable. Second, the Prime female takes longer than the Prime  
371 male to pupate in all treatments. Third, the Prime female pupates earliest in the treatments with the  
372 least competition (6.90 days). Reducing the food level at the lower densities results in later pupation,  
373 but increasing the density increases the age at pupation even further (with little difference between the  
374 food/larva levels). Clearly males and females are responding to different external or internal conditions  
375 to trigger pupation. Males pupate at about 5 1/2 days except when there is a lot of food in the vials;  
376 females pupate earliest in the vials with the least competition but seem to be affected by both the

377 density and the food level in the other treatments. The MANOVA indicated that the two Age at  
 378 pupation variables were not correlated with the four mass variables, so these significant interactions are  
 379 independent of the behavior of the mass variables.

380

381 Table 5. Comparison of Means and (Standard Errors) for the 3 significant interactions for the Age at  
 382 Pupation variables.

| Treatment                                                      |                                                                                                                                      | Prime male<br>age at<br>Pupation<br>F1 X D3 | Prime male<br>age at<br>Pupation<br>F2 X D1 | Prime male<br>age at<br>Pupation<br>F2 XD3 | Prime<br>female age<br>at pupation<br>F1 X D3 | Prime<br>female age<br>at pupation<br>F2 X D1 | Prime<br>female age<br>at pupation<br>F2 X D3 |
|----------------------------------------------------------------|--------------------------------------------------------------------------------------------------------------------------------------|---------------------------------------------|---------------------------------------------|--------------------------------------------|-----------------------------------------------|-----------------------------------------------|-----------------------------------------------|
| <b>Least competition</b>                                       | Low Density—D1=(4 larvae); D3=(4 larvae + 5 larvae)<br>High Food Level— F1=(4 mg/larva + 5 mg/larva); F2=(3 mg/larva + 5 mg/larva)   | 5.59 (0.66)                                 | 5.55 (0.07)                                 | 5.73 (0.53)                                | 6.90 (0.96)                                   | 7.60 (0.28)                                   | 7.88 (0.38)                                   |
| <b>Least food/vial</b>                                         | Low Density—D1=(4 larvae); D3=(4 larvae + 5 larvae)<br>Low Food Level— F1=(2 mg/larva + 3 mg/larva); F2=(2 mg/larva + 4 mg/larva)    | 5.48 (0.17)                                 | 5.40 (0.14)                                 | 5.38 (0.30)                                | 7.75 (0.54)                                   | 7.00 (1.41)                                   | 6.80 (0.91)                                   |
| <b>Most food/vial</b>                                          | High Density— D1=(5 larvae); D3=(7 larvae + 8 larvae)<br>High Food Level— F1=(4 mg/larva + 5 mg/larva); F2=(3 mg/larva + 5 mg/larva) | 6.32 (1.54)                                 | 5.90 (0.85)                                 | 6.25 (1.61)                                | 8.43 (2.87)                                   | 8.15 (0.21)                                   | 9.68 (1.80)                                   |
| <b>Most competition</b>                                        | High Density— D1=(5 larvae); D3=(7 larvae + 8 larvae)<br>Low Food Level— F1=(2 mg/larva + 3 mg/larva); F2=(2 mg/larva + 4 mg/larva)  | 5.50 (0.10)                                 | 5.35 (0.49)                                 | 5.13 (0.15)                                | 8.38 (1.60)                                   | 6.60 (0.57)                                   | 7.13 (1.80)                                   |
| <b>r squared value;<br/>*** = P&lt;0.001,<br/>**=P&lt;0.01</b> |                                                                                                                                      | 0.08***                                     | 0.04***                                     | 0.03**                                     | 0.09***                                       | ns                                            | ns                                            |

383

384 The four mass variables are examined three ways: 1) individually; 2) within sexes to compare the Prime  
 385 individual with the Average; and 3) across sexes to compare the two Primes and the two Averages. The  
 386 MANOVA showed that all four variables had significant positive correlations for each of the three  
 387 interaction contrasts.

388

389 Table 6 presents the means and standard errors for the three significant interactions for both Prime  
390 male mass at pupation and Average male mass at pupation. For the Prime male mass at pupation the  
391 highest mass values are at the high food levels and the lowest are at the low food levels. The lowest  
392 mass value is in the vials with the most competition, but the highest mass value is in the vials with the  
393 most food per vial, not the ones with the least competition. For the Average male mass, the lowest  
394 value is also in the vials with the most competition, but the highest mass value is in the vials with the  
395 least competition. Competition appears to be the main determinant of growth for the Average male.  
396 The Prime male was defined as the largest of the first males to pupate in each vial. The mean values of  
397 the Prime male mass are larger than the mean values of the Average male mass in all treatments except  
398 for the ones with the least competition (low density: high food levels); in these treatments, the Average  
399 mass of males is greater than the Prime male mass. This means that the Prime male pupates while  
400 there is still enough food for the remainder of the males to continue to grow and pupate at a larger size  
401 than the Prime male. Another comparison between the Prime male mass and the Average male mass is  
402 the difference between the two values at low density and low food level (0.03 mg - 0.04 mg) compared  
403 to the two high density treatments (0.10 mg - 0.11 mg) (F1 X D3 and F2 X D3, Table 6). The distribution  
404 of sizes among males is tighter at the lowest total food per vial. A greater difference between the size of  
405 the Prime male and the Average males at low resource levels would be an indicator of interference  
406 competition, thus no interference competition among males is evident here.

407 Table 6. Comparison of Means and (Standard Errors) for the 3 significant interactions for Male Mass at  
 408 Pupation.

| Treatment                                |                                                                                                                                      | Prime male mass at pupation F1 X D3 | Prime male mass at pupation F2 X D1 | Prime male mass at pupation F2 X D3 | Average male mass at pupation F1 X D3 | Average male mass at pupation F2 X D1 | Average male mass at pupation F2 X D3 |
|------------------------------------------|--------------------------------------------------------------------------------------------------------------------------------------|-------------------------------------|-------------------------------------|-------------------------------------|---------------------------------------|---------------------------------------|---------------------------------------|
| <b>Least competition</b>                 | Low Density—D1=(4 larvae); D3=(4 larvae + 5 larvae)<br>High Food Level— F1=(4 mg/larva + 5 mg/larva); F2=(3 mg/larva + 5 mg/larva)   | 2.39 (0.15)                         | 2.34 (0.17)                         | 2.37 (0.17)                         | 2.42 (0.20)                           | 2.41 (0.28)                           | 2.39 (0.23)                           |
| <b>Least food/ vial</b>                  | Low Density—D1=(4 larvae); D3=(4 larvae + 5 larvae)<br>Low Food Level— F1=(2 mg/larva + 3 mg/larva); F2=(2 mg/larva + 4 mg/larva)    | 2.08 (0.21)                         | 2.14 (0.09)                         | 2.10 (0.23)                         | 2.04 (0.23)                           | 2.13 (0.08)                           | 2.07 (0.26)                           |
| <b>Most food/vial</b>                    | High Density— D1=(5 larvae); D3=(7 larvae + 8 larvae)<br>High Food Level— F1=(4 mg/larva + 5 mg/larva); F2=(3 mg/larva + 5 mg/larva) | 2.49 (0.20)                         | 2.39 (0.23)                         | 2.43 (0.24)                         | 2.38 (0.17)                           | 2.37 (0.28)                           | 2.32 (0.23)                           |
| <b>Most competition</b>                  | High Density— D1=(5 larvae); D3=(7 larvae + 8 larvae)<br>Low Food Level— F1=(2 mg/larva + 3 mg/larva); F2=(2 mg/larva + 4 mg/larva)  | 2.05 (0.22)                         | 2.07 (0.39)                         | 2.11 (0.30)                         | 1.95 (0.21)                           | 2.01 (0.43)                           | 2.01 (0.28)                           |
| <b>r squared value; *** = P&lt;0.001</b> |                                                                                                                                      | 0.15***                             | 0.05***                             | 0.07***                             | 0.17***                               | 0.05***                               | 0.09***                               |

409

410 For the Prime female mass at pupation the two highest mass values are also at the high food levels and  
 411 the two lowest are at the low food levels (Table 7). For two of the contrasts the lowest mass value is in  
 412 the vials with the most competition, but the highest mass value is in the vials with the most food per  
 413 vial, not the ones with the least competition (F1 X D3 and F2 X D3, Table 7). Unlike the pattern for the  
 414 Average male mass, the Average female mass mirrors the Prime female mass exactly. The interaction  
 415 for both the Prime and Average female mass variables is the same as that for the Prime male (above).  
 416 The Prime female is defined as the largest female to pupate so it is always larger than the Average.  
 417 Comparing the values of the means of the Prime female mass and the Average female mass, the Prime  
 418 female is about 0.18 mg - 0.20 mg larger than the average female except in the treatment with the low  
 419 density and low food levels (0.08 mg - 0.10 mg). These vials have the lowest levels of total food per vial  
 420 in the experiment. The relative sizes of the Prime females and the Average females are similar across  
 421 treatments except at the lowest total food per vial, when the relative size difference of the two is much

422 smaller. Again, an increase in the distribution of sizes at low resource levels would be an indicator of  
 423 interference competition, thus no interference competition among females is apparent in these two  
 424 contrasts. The distribution of sizes among females is affected by total food per vial, or competition, or  
 425 both, rather than either food level or density independently.

426

427 Table 7. Comparison of Means and (Standard Errors) for the 3 significant interactions for Female Mass  
 428 at Pupation.

| Treatment                                    |                                                                                                                                      | Prime female mass at pupation F1 X D3 | Prime female mass at pupation F2 X D1 | Prime female mass at pupation F2 X D3 | Average female mass at pupation F1 X D3 | Average female mass at pupation F2 X D1 | Average female mass at pupation F2 X D3 |
|----------------------------------------------|--------------------------------------------------------------------------------------------------------------------------------------|---------------------------------------|---------------------------------------|---------------------------------------|-----------------------------------------|-----------------------------------------|-----------------------------------------|
| <b>Least competition</b>                     | Low Density—D1=(4 larvae); D3=(4 larvae + 5 larvae)<br>High Food Level— F1=(4 mg/larva + 5 mg/larva); F2=(3 mg/larva + 5 mg/larva)   | 3.95 (0.32)                           | 3.72 (0.74)                           | 3.66 (0.65)                           | 3.75 (0.31)                             | 3.53 (0.82)                             | 3.48 (0.63)                             |
| <b>Least food/vial</b>                       | Low Density—D1=(4 larvae); D3=(4 larvae + 5 larvae)<br>Low Food Level— F1=(2 mg/larva + 3 mg/larva); F2=(2 mg/larva + 4 mg/larva)    | 2.80 (0.35)                           | 3.04 (0.76)                           | 3.10 (0.68)                           | 2.72 (0.25)                             | 2.98 (0.67)                             | 3.00 (0.57)                             |
| <b>Most food/vial</b>                        | High Density— D1=(5 larvae); D3=(7 larvae + 8 larvae)<br>High Food Level— F1=(4 mg/larva + 5 mg/larva); F2=(3 mg/larva + 5 mg/larva) | 4.03 (0.30)                           | 3.59 (0.85)                           | 3.77 (0.61)                           | 3.85 (0.41)                             | 3.43 (0.70)                             | 3.58 (0.72)                             |
| <b>Most competition</b>                      | High Density— D1=(5 larvae); D3=(7 larvae + 8 larvae)<br>Low Food Level— F1=(2 mg/larva + 3 mg/larva); F2=(2 mg/larva + 4 mg/larva)  | 2.75 (0.59)                           | 3.16 (0.91)                           | 3.01 (0.89)                           | 2.55 (0.48)                             | 3.03 (0.71)                             | 2.83 (0.78)                             |
| <b>r squared value;<br/>*** = P&lt;0.001</b> |                                                                                                                                      | 0.11***                               | 0.06***                               | 0.05***                               | 0.10***                                 | 0.06***                                 | 0.04***                                 |

429

430 For the F2 X D1 contrast, the pattern is different from the other two interaction contrasts for both the  
 431 Prime female and the Average female masses. Prime female mass at pupation is greatest in the vials  
 432 with the least competition (3.72 mg). The lowest value is in the vials with the least total food (3.04 mg).  
 433 The Average female mass at pupation shows the same pattern as the Prime female for this contrast.  
 434 The total food in all the vials in this contrast is at the low end of the total food per vial across the entire  
 435 experiment. This contrast compares the two lowest densities (4 larvae/vial vs 5 larvae/vial), so the

436 highest total food per vial is going to be 25 mg/vial rather than 40 mg/vial (at the 8 larvae/vial density  
437 and 5 mg food per larva). Both density and total food per vial are at the low end of the range of the  
438 entire experiment. Within this subset of the experiment, the females in the vial with the least  
439 competition grow larger than the females with the most total food per vial, so competition appears to  
440 be more important at lower food levels and/or lower levels of total food per vial. Furthermore, the  
441 females in the vials with the least total food are smaller than those in the vials with the most  
442 competition. The greater total food in the vials with the most competition allows those females to grow  
443 larger than in the vials with the least total food, despite the same food/larva in both sets of vials. The  
444 least total food per vial, which results in the smallest mass at pupation for both the Prime and Average  
445 females, also results in the smallest difference between the Prime and Average females (0.06 mg  
446 compared to 0.13 - 0.19 mg for the other treatments). This is similar to the result for the other two  
447 interaction contrasts. An increase in the distribution of sizes at low resource levels would be an  
448 indicator of interference competition, thus no interference competition among females is apparent even  
449 at the lowest food levels. The distribution of sizes among females is affected by total food per vial  
450 rather than either food level or density independently.

451

452 Summarizing the differences within each sex, the interactions reveal differences between the Prime  
453 male mass and the Average male mass with the Prime male growing largest at the highest total food per  
454 vial and smallest in the vials with the most competition. The Average male mass is largest in the vials  
455 with the least competition and smallest in the vials with the most competition (Table 6). For females,  
456 two of the interactions mirror the pattern of the Prime male mass for both Prime female mass and  
457 Average female mass. The remaining interaction (F2 X D1) suggests that lower total food per vial affects  
458 the competition among females in these vials—a subset of the entire experiment (Table 7).



459 Comparing the two sexes at pupation (Tables 6 and 7), the Prime female mass is always greater than the  
460 Prime male mass, but the difference is larger at high food levels (1.20 mg -1.56 mg) than at low food  
461 levels (0.70 mg - 1.09 mg). The Average female mass is similarly greater than the Average male mass,  
462 and the difference is also larger at high food levels (1.06 mg - 1.47 mg) than at low food levels (0.60 mg -  
463 01.02 mg), but the difference between the two Averages is always smaller than the difference between  
464 the two Prime masses. This indicates that females outcompete males for food within the limits of the  
465 food x density experiment.

466  
467 For the two interactions F1 X D3 and F2 X D3, the difference between the female and male masses is  
468 smallest in vials with the most competition followed by the vials with the least total food. The  
469 difference in size of the Prime male and female is similar in the vials with the least competition and most  
470 total food, but the difference between the Averages is greater for the most total food than for the least  
471 competition. For the interaction F2 X D1, the smallest difference between the mass of males and  
472 females is in the vials with the least food and the largest difference is in the vials with the least  
473 competition. An increase in the distribution of sizes at low resource levels would be an indicator of  
474 interference competition, thus no interference competition between males and females is apparent.

475

## 476 Effect of sex ratio and food on mosquito larval growth

477 In the sex ratio experiment, the food per larva and the larvae per vial were chosen from the middle of  
478 the values for the first experiment: 3 mg/larva or 4 mg/larva, and 5 larvae/vial or 6 larvae/vial. The sex  
479 ratio was calculated for each vial with 100 % pupation (100 % survival). As mentioned earlier, neither  
480 the sex ratio nor the Food level can be determined accurately if there is any mortality.

481 For the subset of vials with 100 % pupation, the overall sex ratio was 52 % male. As before, the mass  
482 was measured for each pupa and values were calculated for Prime male mass, Average male mass,

483 Prime female mass and Average female mass. Means, standard deviations and sample sizes for the  
484 mass of the Prime male are presented in S11 Table arranged by sex ratio (% males) and by food level.  
485 The food level obviously affects the size of the Prime male. At both food levels the mass of the Prime  
486 male appears to increase with an increase in the % males in the vial. The regression of mass on sex ratio  
487 was significant at the lower food level ( $F(1,18) = 7.869$ ,  $P < 0.05$ ,  $r^2 = .20$ ), but not at the higher  
488 food level ( $F(1,12) = 3.256$ , NS). At the lower food level, the mass of the Prime male increases as the  
489 percent of males increases. None of the other three mass variables had a significant regression on sex  
490 ratio at either food level.

491  
492 Because males pupate earlier and at a smaller mass than females, an increase in percent of males is  
493 expected to correspond to a relative increase in food level. At the lower food level, the mass of the  
494 Prime male increases as the percent of males increases; an increase in the percent of males acts as  
495 though the food level increased for the Prime male. Since none of the other mass variables responds to  
496 sex ratio at either food level, this suggests that the Prime male outcompetes the other males for food.  
497 The Prime male mass is included in the Average male mass, so a systematic increase in the Prime male  
498 mass with no effect on the Average implies that the non-Prime males are symmetrically decreasing in  
499 size. It also suggests that females are unaffected by competition with males, which implies that the two  
500 sexes are using the food resource differently.

501

## 502 Discussion

503 Mosquito larvae filter particles indiscriminately [48,50] . They can filter particles from the water  
504 column, from submerged surfaces (leaves, container walls), and abrade solids (such as dead larvae or  
505 other carcasses) into ingestible particles [38,66–68]. Besides discrete particles such as the yeast cells

506 used in these experiments, in nature mosquito larvae may ingest gels, colloids and dissolved nutrients  
507 that contribute to their nourishment [66]. In contrast to the indiscriminate filtering, mosquito larvae  
508 actively seek out and aggregate at food rich locations, respond to organic chemicals that leach from  
509 potential food, change their feeding rate (the beating rate of the lateral palatal brushes), and alter the  
510 proportion of time spent feeding in response to hunger, food availability, and neurochemicals  
511 [38,67,68]. Many filter feeders, including some mosquito larvae, pass much of the ingested food  
512 through the gut intact [48,52,66,69]; only the most available subset of nutrients is assimilated. Normal  
513 feeding for *A. aegypti* larvae results in passage through the gut in 0.5-1.0 hour [66]. When food level  
514 (mg/larva) decreases, the proportion of the total nutrients assimilated and hence the efficiency (mg  
515 larval growth/mg food ingested) can be increased by decreasing the feeding rate and retaining food  
516 within the gut for longer intervals in other filter feeders [31,52]. In a pattern analogous to tadpoles,  
517 mosquito larvae retain food when transferred into distilled water [48] suggesting that they may vary  
518 their feeding rates and efficiencies in response to the availability of food similarly.

519  
520 Other experiments show that male and female 4th instar larvae are competent to pupate at 24-36  
521 hours after they molt from the 3rd instar [70-73], but that high food levels cause them to delay  
522 pupation until they attain a maximum weight [53,70,72], and that the time to pupation and the actual  
523 size of the adult is affected by the temperature of the larval environment [25,61,70,72,74] as well as  
524 food level and density (see above), the type or quality of the food source [6,24,25,75-80] and, of course,  
525 the sex of the individual [21,37,70-72,74,81].

526  
527 Biochemical investigations of the triggers to pupation in 4th instar larvae reveal that during the growth  
528 period of the 4th instar, more than 75% of the larval mass is accumulated [70,71,74] as well as most of  
529 the sexual dimorphism in mass [70,72]. Protein, sugars, and glycogen increase linearly with mass for

530 both sexes [70,71,81–84] while lipids increase exponentially, and faster in males than females  
531 [70,71,81]. The triggers to pupation remain obscure, but minimum size, nutritional state, multiple  
532 hormone levels, specific gene activation/deactivation, and interactions among all of these have been  
533 implicated [25,61,70–74,81,85]. Pupal size is positively related to adult size, longevity/survival, sperm  
534 production, blood meal consumption, the size and number of eggs [1,54,73,81,84–87] and inversely  
535 related to the length of the gonotrophic cycle, and susceptibility to disease [81,87–91], but see [92–97].  
536  
537 Mosquito larvae in these microcosms create a dynamic system. Eggs were hatched by immersion and  
538 1st instar larvae were counted into vials with a large number of newly-added yeast particles. As the  
539 larvae filter the particles and pass them through their guts, small initial differences in size and  
540 opportunity develop into larger differences in size. Larger individuals filter more effectively than smaller  
541 ones, so larger individuals obtain more food particles than smaller ones. However, as individuals grow,  
542 their metabolic needs increase and less of the food is used for growth as more is used to maintain the  
543 existing mass. In isolation, each individual would follow a sigmoid growth curve determined by the  
544 initial quantity of food in the vial. In the experimental vials, larvae compete for food particles with each  
545 other. There are three environmental conditions that change over time: the larvae increase in size, with  
546 concomitant increases in demand for nutrients, ability to filter, and volume of gut in which to retain  
547 particles; the number of particles remains constant, so the apparent number of particles decreases; the  
548 quality of the particles decreases with each pass through the gut of a larva. Each of these environmental  
549 conditions increases the competition among larvae as they grow. Food particles are plentiful and of  
550 high quality for the 1st instar larvae and probably for 2nd instar larvae, but become less plentiful and of  
551 lower quality for 3rd instar larvae and even less plentiful and of even lower quality for 4th instar larvae.  
552 When food particles are abundant and their quality is high, larvae pass the particles rapidly through  
553 their guts and extract the most available nutrients. During the third and fourth instars the larger size of

554 the larvae increases their demand for food, and the relative quantity and quality of the food particles  
555 decreases. In response to this, the female larvae retain the particles in their guts for longer; this further  
556 decreases the apparent number of food particles and their quality, reinforcing the retention of food  
557 particles. The initial conditions of the experiment probably have little effect on the growth of the first  
558 and second instar larvae, but increasing effects on the third and fourth instar larvae, influencing the age  
559 and mass at pupation. Food level and density have been shown to affect competition among mosquito  
560 larvae already; the aim of this paper is to understand the differences in competition among male and  
561 female larvae and how that affects pupation and the adult life cycle.

562  
563 Survival in the food x density experiment is one potential measure of competition among the mosquito  
564 larvae. In the significant interaction contrasts, Survival was highest in the vials with the least  
565 competition and lowest in the vials with the least total food, so there is an effect of competition on the  
566 survival of larvae. However, only 63 % of the variation in Survival is explained by the treatments and 30  
567 % of that is explained by Food level alone. The MANOVA correlation coefficients corroborate the  
568 relatively low contribution of Survival to the significance of the contrasts.

569  
570 The main treatments, food level and density, and the interactions, total food per vial and non-lethal  
571 competition, affect the mass and age at pupation; large mass and early pupation increase the fitness of  
572 the adult male mosquito, while large mass at pupation is primarily important to the fitness of the female  
573 mosquito [1]. Mass and age at pupation together describe the growth rate of the larva to the pupation  
574 endpoint.

575

576 **Differences between males and females**

577 The MANOVA gives us insight into the relationships among the variables. Increased food level  
578 (mg/larva) increases mass for all larvae. Females are affected more than males, Prime females more  
579 than Average females, Average males more than Prime males. Increased food level has no effect on  
580 Prime female age at pupation and only a small effect Prime male age at pupation. Prime male age at  
581 pupation increases with increasing food level.

582

583 Also, in the MANOVA, increased density (larvae/vial) increases mass for all larvae. Males are affected  
584 more than females, Prime males more than Average males, Prime females more than Average females.  
585 Increased density increases age at pupation for both Prime males and Prime females; Prime male age at  
586 pupation is affected more than Prime female age at pupation.

587

588 There are three significant interactions in the MANOVA; these interactions describe how competition  
589 and total food per vial affect the interplay of the food level and density treatments. The three main  
590 MANOVA interactions (F1 X D3, F2 X D1, and F2 X D3) affect male mass more than female mass, Average  
591 males more than Prime males, and Prime females more than Average females. The interactions have no  
592 effect on Prime female age at pupation. Only the F2 X D1 interaction affects Prime male age at  
593 pupation.

594

595 The univariate r squared values for food level and for density are similar to the MANOVA correlations for  
596 the relationships between male mass and female mass. The mean values (mg) of all four mass variables  
597 increase with increasing food level. Density does not have the same effect on each of the four mass  
598 variables. Prime male mass is highest at the highest density. Average male mass is highest at the lowest  
599 density. Prime female mass increases with density, but is lowest at the highest density. Average female  
600 mass is also lowest at the highest density. In the univariate analyses, food level alone accounts for more

601 than half of the variation in the two female mass variables and just less than half of the variation in the  
602 two male mass variables. Density alone accounts for much less of the variation than food level in all  
603 four mass variables. The interactions between food level and density account for more of the variation  
604 in these variables than density alone.

605

606 The r squared values for Prime male and Prime female age at pupation are relatively higher than the  
607 corresponding MANOVA correlations for both the food level and density treatments. There are effects  
608 of the experimental treatment on age at pupation that did not contribute to the MANOVA significance.  
609 The Prime male and female age at pupation are both highest at the highest food level. They are also  
610 both highest at the highest density. These are the vials with the highest total food per vial. Increased  
611 mass at pupation is beneficial to the fitness of the adult mosquito of both sexes. Increased age at  
612 pupation is potentially detrimental to adult males, probably less so to adult females. Total food per vial  
613 appears to affect the larvae and some of the effect of density may be due to the total food per vial. This  
614 should be apparent in the interactions.

615

616 The r squared values for the interactions F1 X D3 and F2 X D3, correspond to the MANOVA correlations:  
617 they explain the variance in male mass more than female mass, Average males more than Prime males,  
618 and Prime females more than Average females. The r squared values for the interaction F2 X D1 (low  
619 density treatments) are slightly higher for females than for males, and explain the same amount of  
620 variance in the mass of Prime females and Average females, and in the mass of Prime males and  
621 Average males. In contrast to the MANOVA correlations, there is a significant interaction (F1 X D3) for  
622 Prime female age at pupation, and all three interactions have significant r squared values for Prime male  
623 age at pupation.

624

625 All three of the main interactions consist of 4 treatment combinations: least competition, most  
626 competition, least food per vial and most food per vial (Tables 4-7). For instance, Survival is highest in  
627 vials with the least competition and lowest in vials with the least food per vial. Both are low density  
628 treatments. If competition is affecting the mass at pupation, the mass should be highest in the vials  
629 with the least competition. This is only true for the Average male mass and the Prime and Average  
630 female mass in the F2 X D1 interaction (low density). Alternatively, competition could be causing the  
631 lowest masses to occur in the vials with the most competition. This is the case for the Prime male and  
632 the Average male in all three interactions, and the Prime and Average females in two of the interactions  
633 (F1 X D3 and F2 X D3). Males and females respond differently to the high and low competition  
634 treatment combinations and females respond differently in low densities (D1) than across the full range  
635 of densities (D3). If total food per vial is important, then the lowest masses should be in the vials with  
636 the least total food; this is only true for Prime and Average females in the F2 X D1 interaction.  
637 Alternatively, the highest masses could be in the vials with the most total food. This is true for the Prime  
638 males in all three interactions and the Prime and Average females in the F1 X D3 and F2 X D3  
639 interactions.

640

641 Prime males, Prime females and Average females grow largest in the vials with the most total food and  
642 smallest in the vials with the most competition. However, females at low density grow largest in vials  
643 with the least competition and smallest in vials with the least total food. Average males grow largest in  
644 the vials with the least competition and smallest in the vials with the most competition. Prime and  
645 Average females respond to the treatment conditions similarly to one another, but the Prime and  
646 Average males respond to the same treatment conditions differently from each other. Competition  
647 among males differs from competition among females. The food level and total food per vial affect  
648 competition for both sexes, but these effects are different across sexes.



649

650 Prime male age at pupation is greatest in the vials with the most food and least in the vials with the  
651 most competition. This corresponds to the Prime male mass. In the vials with the most food, the Prime  
652 male grows largest and delays pupation. In the vials with the most competition, the Prime male is  
653 smallest and pupates earliest. For the one significant interaction affecting the Prime female age at  
654 pupation, the greatest age at pupation is in the vials with the most food and the earliest is in the vials  
655 with the least competition, another difference between males and females.

656

657 Age and mass at pupation together are a measure of growth rate. For both the Prime male and the  
658 Prime female, the growth rates are highest in the vials with the least competition. This highest growth  
659 rate for the Prime female is higher than the growth rate for the Prime male in each of these interactions.  
660 Despite taking longer to pupate, females grow faster than males in the vials with least competition.  
661 [Note that growth is expected to be a sigmoid curve in which the instantaneous growth rate increases to  
662 an inflection point and then decreases towards zero. If the males pupate lower on the curve than  
663 females, then they could appear to have a lower growth rate than females even if they grow at the same  
664 rate.] The slowest growth rates for males and females are in the vials with the highest densities (most  
665 competition and most food per vial). The F2 X D1 interaction differs in that the Prime female has the  
666 lowest growth rate in the vials with the least total food.

667

668 There are consistent differences between male and female larvae across the three main interactions.  
669 Competition among males and among females needs to be considered separately. Furthermore, the  
670 results of the sex ratio experiment show that the percent of males in the vial affects the growth of males  
671 at low food levels, but not that of females; this supports the observation that there is a difference in the  
672 way the two sexes compete for the same food resource.

673

## 674 Competition among females

675 The mass at pupation of females is directly related to the food level. Food level explains 8-10 times the  
676 experimental variance that density explains and three times the variance that the three main  
677 interactions explain (Tables 2 and 3). In contrast, age at pupation is better explained by density than by  
678 food level or the interactions, although the Prime female age at pupation is the variable least affected  
679 by the experimental conditions. Competition is described by the interactions, so competition appears to  
680 be less important to females than the food level.

681

682 These two experiments look at competition among females in five ways: the interactions identify  
683 differences in 1) mass and 2) age at pupation under various levels of competition; 3) the difference  
684 between the Prime and the Average female masses indicates possible interference competition; 4) the  
685 differences in growth rate of the Prime female in the different treatment combinations is another  
686 measure of competition; and 5) the lack of effect of the percent of males on the mass of females  
687 indicates that females outcompete males.

688 1) The mass at pupation responds differently in the F2 X D1 interaction than in the other two. All the  
689 vials in this interaction have either 4 larvae or 5 larvae; this is the low density treatment in the F1 X D3  
690 and F2 X D3 interactions. Because the food is added on a per larva basis, the total food levels in these  
691 vials are lower as well. For this interaction, the largest females are in the vials with the least  
692 competition and the smallest are in the vials with the least total food (for both Prime and Average  
693 female mass at pupation). These are the vials with 4 larvae. In the higher density treatment, the vials  
694 with 5 larvae, the masses at the high food level are lower, but the masses at the low food level are  
695 higher, than in the vials with 4 larvae. The addition of a larva plus an increment of food reduces the size  
696 of the females at the high food level, but increases the size of females at the low food level.

697 In the F1 X D3 and F2 X D3 interactions, the largest females are in the vials with the most total food and  
698 the smallest females are in those with the most competition; these are both the high density treatments  
699 (7 larvae or 8 larvae per vial). The masses of Prime and Average females in the low density treatments  
700 (4 larvae or 5 larvae per vial) are similar to the masses observed in the F2 X D1 interaction, suggesting  
701 that the difference is due to the higher density or higher total food level in the other vials. The masses  
702 of females in the F1 X D3 and F2 X D3 interactions are higher than that of the females in the F2 X D1  
703 interaction in the vials with the greatest total food, and lower than those in the F2 X D1 interaction in  
704 the vials with the greatest competition. The additional larvae in the high density vials, plus the  
705 additional increments of food, increase the pupal masses of females in the high food vials and decrease  
706 the masses of females in the low food (most competition) vials. For females, competition is affected by  
707 food level (food/larva), density (larvae/vial) and total food per vial.

708 2) The Prime female pupates earliest in the vials with the least competition and latest in the vials with  
709 the most total food per vial. The Prime female age at pupation is less affected by competition (or any  
710 treatment) than any other variable.

711 3) There is no indication of interference competition based on the size distribution of females at  
712 pupation. At the lowest total food levels this distribution is compressed rather than elongated. In the  
713 other vials the difference between the Prime female and the Average female mass is approximately the  
714 same (0.20 mg). Comparing the Prime females in the vials with the lowest total food to those in the  
715 vials with the most competition (equivalent food/larva) and similarly comparing the Average females in  
716 those two treatments, it appears that the tighter distribution of sizes is due to the relative increase in  
717 size of the Average females at the lower density. Two things are likely causes: 1) the number of particles  
718 becomes limiting to the females earlier in the vials with the lowest total food and they switch to  
719 retention before they have developed the same size distribution as in the other vials, and 2) there is  
720 little or no difference in the ability of females to extract nutrients from the retained particles, so they all

721 grow equally well from that point. When the females in the low total food vials switch to retention from  
722 filtering, the net effect is a more equal distribution of food among them, as compared to females in the  
723 vials with the most competition.

724 4) The growth rate of the Prime female is greatest in the vials with the least competition. Growth rate  
725 was approximated by dividing the mean values of the Prime female mass by the corresponding mean  
726 value of the Prime female age at pupation for each treatment combination. No additional significance  
727 tests were applied.

728 5) Female mass at pupation is unaffected by the percent of males in the vial (at the food levels and  
729 densities tested). Females larvae appear to be unaffected by competition with male larvae.

730 At low density the least competition results in the largest females and the least total food results in the  
731 smallest females. At high density the most total food results in the largest females and the most  
732 competition results in the smallest females. The low density treatments across all three interactions are  
733 comparable in treatment conditions and outcomes, so the high density (7 larvae or 8 larvae) is  
734 qualitatively different. Competition among females at high density results in smaller masses at pupation  
735 despite equivalent food/larva levels. High total food levels at high density result in larger masses at  
736 pupation despite equivalent food/larva levels. If total food per vial were entirely responsible for these  
737 observations the addition of a larva (from 4 larvae to 5 larvae) and an increment of food (per larva)  
738 should not lower the mass at pupation of females at the high food level (more total food) and increase  
739 the mass of females at the low food level (more competition). The 5 larvae in the vials with the most  
740 competition do better than the 4 larvae in the vials with the same food/larva, while the 5 larvae in the  
741 vials with the most food don't do as well as the 4 larvae with the same food/larva, the vials with the  
742 least competition. At the higher densities (7 larvae or 8 larvae), the reverse is true. The 7 or 8 larvae in  
743 the vials with the most competition do worse than the 4 or 5 larvae in vials with the same food/larva,

744 while 7 or 8 larvae in the vials with the most food do better than the 4 or 5 larvae in the vials with the  
745 least competition (equivalent food/larva).

746

747 For female larvae, there are 6 environmental conditions indicated by the three main interactions:

748 1) Vials with the least competition—These females grow fastest and pupate earliest. This is the  
749 benchmark to compare the other treatments against.

750 2) Vials with the least total food—These females pupate at a smaller mass than those in vials with the  
751 least competition and there is a tighter distribution of masses (smaller difference in size between the  
752 Prime and Average females) than in all the other vials. There is no indication of interference  
753 competition; the reduced size distribution is probably due to females retaining the particles in their guts  
754 for longer periods to extract more nutrients. In these vials, it appears that the low total food causes  
755 females to switch from filtering to retention at an earlier instar before large differences in size have  
756 developed, resulting in the compressed size distribution. Retention supplies fewer nutrients over time  
757 than filtering particles and passing them rapidly through the gut, resulting in smaller size at pupation  
758 and a slower growth rate than in the vials with the least competition.

759 3) Vials with the most total food (5 larvae)—These females have more total food than those in the vials  
760 with the least competition (4 larvae), but they don't grow as fast or as large. The addition of one more  
761 larva even with the incremental food/larva reduces the growth rate and final mass. The larvae filter  
762 rapidly for long enough to develop the same size distribution as in the vials with the least competition,  
763 but end up approximately 0.10 mg smaller than those in the vials with the least competition. This also  
764 suggests that filtering promotes growth better than retention.

765 4) Vials with the most competition (5 larvae)—These females also have more total food than those in  
766 the vials with the least total food (4 larvae), and they grow larger than those females. In this case, the  
767 incremental food/larva is more beneficial than the addition of the extra larva is detrimental. Vials with 4

768 larvae get 8 mg or 16 mg of food, while the vials with 5 larvae get 10 mg or 20 mg of food. The mean  
769 Prime and Average female masses for total food levels of 8 mg and 10 mg range from 2.50 mg to 2.52  
770 mg. The masses for total food levels of 16 mg and 20 mg are 1.0 mg higher (40%, 3.45 mg to 3.80 mg).  
771 The largest increase is in the vials with 5 larvae and 20 mg total food. There appears to be a change in  
772 the growth of female larvae at food levels between 16 mg and 20 mg total food per vial that results in a  
773 disproportionate increase in the mass of females. It appears that females in vials with less food switch  
774 to retention as they perceive the number of particles decreasing and thereafter grow more slowly, while  
775 females in vials with more total food (20 mg per vial and greater) continue to filter and grow at a faster  
776 rate, and to a larger size.

777 5) Vials with the most total food (7 larvae or 8 larvae)—These females grow larger than any other  
778 females and take longer to pupate. All these vials have more than 20 mg of food in them. Females in  
779 the vials with the least competition grow faster and pupate earlier, so these females delay pupation and  
780 become larger. As mentioned earlier, larger filter feeders have an advantage over smaller ones, but as  
781 they grow in mass, each increment in mass adds less and less to that advantage. At some point the  
782 individual will reach an equilibrium where the filtering is only sufficient to maintain its mass, not  
783 increase it. Females in vials with the most total food may grow as fast as those in the vials with the least  
784 competition and then extend their larval growth period to increase in size at the expense of their growth  
785 rate. For females, large adult mass is more beneficial than early age at pupation.

786 6) Vials with the most competition (7 larvae or 8 larvae)—These females are smaller than those in any  
787 other vials. The total food in these vials ranges from 14 mg to 32 mg (14 mg, 16 mg, 21 mg, 24 mg, 28  
788 mg, 32 mg), yet the females pupate at smaller masses than those with the least total food: 8 mg to 20  
789 mg (8 mg, 10 mg, 12 mg, 15 mg, 16 mg, 20 mg). The total food per vial is higher and the relative food  
790 (per larva) is identical, yet the females in the higher density vials do not grow as large. These females  
791 must switch from filtering to retaining particles later than those in the vials with the least total food,

792 because they do develop a size distribution that resembles the vials with the least competition and the  
793 vials with the most total food. The additional larvae in the vials with the most competition must reduce  
794 the available particles sufficiently that the effective food level is lower than in the vials with the lowest  
795 total food.

796

797 Summary: The environment that the larvae experience in their vials changes over time and the larvae  
798 respond depending on the initial conditions of the vials (food level and density). For females, food level  
799 (mg/larva) is the most important factor, but competition, total food per vial, and density also influence  
800 the mass and age at pupation. Females in the vials with the least competition grow fastest. They  
801 pupate at large sizes (not always the largest, but close) and earlier than in the other treatments. These  
802 vials are the optimum environment for females within this experiment. These females probably filter  
803 particles and pass them rapidly through their guts until they pupate. Pupation probably occurs when  
804 the quality of the food particles is insufficient to support further growth. In contrast, females in the vials  
805 with the least total food begin retaining food early in larval development. They grow slowly and are  
806 among the smallest at pupation. Pupation probably occurs when the quality of the food particles is  
807 insufficient to support further growth. Females in vials with 5 larvae (instead of 4 larvae) don't grow as  
808 large at the higher food levels, so the added larva reduces the apparent number of particles and causes  
809 a switch to retention before pupation. Retention is less effective than filtering so these females are  
810 smaller than those in the vials with the least competition despite the equivalent food/larva. However,  
811 females in vials with 5 larvae (instead of 4 larvae) grow larger in the vials with the most competition. In  
812 this case the total food per vial is greater and the females switch to retention later than those in the  
813 vials with the least total food. They don't grow as large as the females in the vials with more total food,  
814 but they are larger than the ones with the least total food (despite equivalent food/larva). At higher  
815 densities (7 or 8 larvae) the females in the vials with the most competition are even smaller at pupation

816 than those in vials with the least total food. These females switch to retention later than those in the  
817 vials with the least total food; they develop a distribution of sizes similar to those in the vials with the  
818 least competition. Once they switch to retention, the larger number of females reduces the apparent  
819 number of particles below the level of that in the vials with the least total food, and the pupae are  
820 smaller despite the equivalent food/larva. In these vials, pupation may be triggered by low food particle  
821 quantity rather than low quality. Again at high densities (7 or 8 larvae) the females in the vials with the  
822 most total food are even larger than those with the least competition. These females filter and pass the  
823 food rapidly through their guts until pupation, similarly to those females in the vials with the least  
824 competition. However, the large excess of food allows them to continue to grow, albeit at a slower  
825 pace, for more than a day after the Prime females in the corresponding vials with least competition have  
826 pupated. It is possible that pupation is triggered by larval size rather than by diminished food quality or  
827 quantity.

828

## 829 Competition among males

830 Male larvae respond differently to the treatment conditions and interactions than female larvae. While  
831 male pupal mass is also affected by the food level more than by density or interactions, density and  
832 interactions are relatively more important than food level as compared to females. Food level explains  
833 only 41 % to 47 % of the variance in mass at pupation for males, compared to 64% for females. Density  
834 explains 12 % to 16 % of the variance in mass at pupation for males compared to 6 % to 8 % for females.  
835 The three main interactions explain 27 % to 31 % of the variance for males compared to 20 % to 22 % for  
836 females (Tables 2 and 3). These comparisons are qualitatively similar to the MANOVA results in Table 1.  
837 Since competition effects show up in the interactions, competition is relatively more significant for  
838 males than for females, and more significant for the Average males than for the Prime male. Another  
839 difference between males and females is in the way that the Prime male and Average males respond to



840 the interactions. While both Prime and Average females' masses respond to the interaction treatment  
841 combinations in the same way, the Prime male and the Average male masses grow largest in different  
842 treatments. The Prime male mass is largest in the treatments with the most total food per vial, similar  
843 to the female mass variables, while the Average male mass is largest in the vials with the least  
844 competition.

845

846 These two experiments look at competition among males in 5 ways: the interactions identify  
847 differences in 1) mass and 2) age at pupation under various levels of competition; 3) the difference  
848 between the Prime and the Average males indicates possible interference competition; 4) the  
849 differences in growth rate of the Prime male in the different treatment combinations is another  
850 measure of competition; and 5) the significant regression of the percent of males on the mass of the  
851 Prime males at the lower food level.

852 1 & 2) The Prime male grows to the largest mass and takes the longest to pupate in the vials with the  
853 most total food. The Prime male pupates earliest and at the smallest mass in the vials with the most  
854 competition. These are both high density treatments. The vials with the least competition produce  
855 Prime males that are smaller than the ones with the most total food, and they pupate earlier, however,  
856 Prime males in the vials with the least competition have the highest growth rates across all the vials.  
857 Prime males in all three interactions grow and pupate like Prime and Average females in the F1 X D3 and  
858 F2 X D3 interactions; total food per vial has a positive effect on mass at pupation and competition has a  
859 negative effect. However, the effect of the treatments on the age at pupation is different for males and  
860 for females; males delay pupation at high total food per vial, like females, but pupate earliest in vials  
861 with the most competition, where females pupate earliest in vials with the least competition.  
862 Average males grow largest in the vials with the least competition and are smallest in the vials with the  
863 most competition. Another feature of the vials with the least competition is that the Average male mass

864 is greater than the Prime male mass; the male larvae remaining in the vial after the Prime male pupates  
865 grow larger than the Prime male on the food resource that is left. Considering that the Prime male  
866 outcompetes the other males, when the Prime male pupates, the next larger male should assume the  
867 dominant role until he pupates, followed by the next, and so on. At least one of these males must be  
868 larger than the Prime male for the Average mass to be greater than the Prime mass. This implies a  
869 competitive release after the Prime male pupates as well as a considerable amount of food left over.  
870 Males in the vials with the highest total food per vial take longer and grow larger than the males in the  
871 vials with least competition. If optimizing mass against early pupation were the only criteria that male  
872 larvae use to determine when to pupate, then the Prime male mass and age at pupation should be the  
873 same here as in the vials with the least competition. They are not; males in a high food environment  
874 delay pupation and increase further in mass.

875 3) There is no indication of interference competition based on the size distribution of males at pupation.  
876 At the lowest total food per vial this distribution is compressed rather than elongated as it would be if  
877 the larval mosquitoes engaged in some kind of interference competition. In vials with higher densities  
878 the difference between the Prime male and the Average male mass is approximately the same  
879 regardless of the treatment. This smallest difference in size between the Prime male mass and the  
880 Average male mass in the vials with the lowest total food per vial may indicate an effect of total food  
881 per vial at the lower end of the range as well as at the upper end. The Prime male in these vials is not  
882 much larger than those in the vials with the most competition and the age at pupation is also not much  
883 greater. However, the Average male mass in these vials is relatively larger than the corresponding  
884 masses in the vials with the most competition, resulting in the tighter size distribution. More intense  
885 competition for food due to the particle retention by the female larvae reduces the size of the Prime  
886 male, but allows the non-Prime males to continue to grow after the Prime male pupates, whereas the  
887 most intense competition affects the non-Prime males more.

888 4) Prime males in the vials with the least competition have the highest growth rates across all the vials.

889 Prime males in the vials with the most competition take less time, and pupate at lower masses than  
890 those in the vials with the least competition. They also pupate earlier and at lower masses than Prime  
891 males in the vials with the least total food per vial (the same food/larva treatments at the lower  
892 density). The effect of increased density is to increase competition despite increasing the total food per  
893 vial and maintaining proportional food resources. Under this competitive stress Prime males pupate  
894 earlier and at lower masses. The growth rates are also lower, suggesting that the males are smaller not  
895 just because they pupate earlier, but because they are not able to grow as well.

896 5) From the sex ratio experiment we know that at low food levels, the Prime male mass increases as the  
897 percent of males in the vial increases. The Average mass does not change so the increase in mass of the  
898 Prime male is offset by the decrease in mass of the non-Prime males. The Prime male outcompetes the  
899 other males for food (at 3 mg/larva) and the advantage of the Prime male increases as the percent of  
900 males increases.

901

902 Because the Prime male benefits from the increased percent of males at the low food level, but none of  
903 the other mass variables are affected by the percent of males at either food level, the environment that  
904 males experience in the vials must take into consideration what the female larvae are doing. During the  
905 early growth of the larvae, food levels are expected to appear high because the larvae are small and the  
906 quality of the food is initially at its highest. As they grow and females switch from filtering to retention  
907 in some vials, the males will experience a reduction in the number of food particles as well. Since the  
908 Prime male is affected by the percent of males in exactly the vials where the females are retaining food,  
909 it appears that males do not retain food but continue to filter particles and pass them rapidly through  
910 their guts even as the particle numbers decrease.

911

912 There are only 4 environmental conditions indicated by the three main interactions for males:

913 1) Vials with the least competition—Prime males grow at the fastest rate and pupate at sizes close to  
914 the largest. Average males grow even larger. Since females in these vials also grow at the fastest rate  
915 across the experiment, it appears that the Prime male filters particles and grows to a size that allows or  
916 triggers pupation, and then the remaining males experience a net increase in food particles that allows  
917 them to grow even larger. The Prime male is not retaining particles as females do when particle  
918 numbers or quality decreases, but it does sequester some number of particles as they pass through the  
919 gut. It is the release of these particles at pupation that drives the non-Prime males to grow further.

920 2) Vials with the least total food—the Prime male pupates at masses and ages that are almost as low as  
921 in the vials with the most competition. In these vials, the females appear to be food limited and switch  
922 from filtering to retention earlier than in other vials, reducing the number of particles and the particle  
923 quality further. These vials correspond to the conditions in the second experiment where the Prime  
924 males benefit from the increased percent of males in the vial. The Prime male competes with the other  
925 males for particles, the numbers of which the females affect by retaining the particles in their guts. The  
926 low total food per vial causes the females to switch to retention earlier and this causes the males to  
927 experience an even lower total food per vial. The Prime male pupates at a size almost as small as in the  
928 vials with the most competition and almost as early. As in the vials with the least competition, the non-  
929 Prime males experience a small benefit from the additional food made available once the Prime male  
930 pupates, and they grow larger than the non-Prime males in the vials with the most competition. While  
931 the size distribution of the female larvae is compressed because they switch to a less effective method  
932 of feeding at low food levels, the size distribution of the male larvae is compressed because they have  
933 less total food available to them due to the retention of the females. The results of the sex ratio  
934 experiment indicate that the males are competing in a pure exploitative mode at the low food levels  
935 (where one would expect interference competition), the fewer the females present, the more available

936 particles and the larger the Prime male grows. Because the size of the Average males is not affected by  
937 the percent of males, the non-Prime males decrease in size proportionately to the Prime male's  
938 increase. This indicates that the males are filtering even at low food levels. If they were retaining food  
939 particles as the females appear to do, we would not see this change in the size distribution due to the  
940 percent of males in the vials.

941 3) Vials with the most total food—in these vials, females extend their growth beyond that of females in  
942 the vials with the least competition and Prime males do the same thing (both age and mass at pupation  
943 are greater). Prime males grow larger and pupate later in these vials than in any others across the  
944 experiment. The females filter particles throughout their larval growth and extend that growth period  
945 for two days longer than the Prime male. Prime males pupate between 5 and 6 days except in these  
946 vials with the most total food. Prime females pupate between 6 and 9 days except in the vials with the  
947 highest densities. When food particles are available and/or food quality is still high, the 4th instar larvae  
948 of both sexes delay pupation to increase further in size. The Prime male is 0.5 mg to 1.0 mg larger than  
949 Prime males in the vials with the least competition.

950 The Average male in the vials with the most total food are almost as large as the Average males in the  
951 vials with the least competition. They are similar in size to the Prime males in the vials with the least  
952 competition (.03 mg larger to .05 mg smaller) indicating that males experience little competition in the  
953 vials with the most total food. However, they do not experience the release of food particles and grow  
954 to be larger than the Prime male as in the vials with the least competition. The most likely explanation  
955 for the difference in outcome between the Average males in the vials with the most food and the  
956 Average males in the vials with the least competition is that males are constrained or driven to pupate  
957 by a certain age so when the Prime male delays pupation it compresses the distribution of ages at  
958 pupation for the rest of the males, limiting the benefit that the additional food bestows on the non-

959 Prime males in the vials with the most total food. [The distribution of ages at pupation within  
960 microcosms was not analyzed in this experiment.]  
961 4) Vials with the most competition—the Prime male pupates at the earliest age and smallest mass. The  
962 Average male mass is also smallest in these vials. Prime and Average female masses are also smallest at  
963 the highest Density (7 or 8 larvae/vial) and close to the smallest in the 5 larvae/ vial treatment. The total  
964 food per vial is high enough at these high densities so that the larvae filter and grow large enough to  
965 develop a size distribution similar to those in the vials with the least competition. As they grow food  
966 particles become relatively scarcer and the females switch from filtering to retaining the particles,  
967 making them even scarcer. The males respond to the change in the number of food particles by  
968 pupating earlier and at the smallest sizes across the experiment.

969  
970 Summary: The environment that the larvae experience in their vials changes over time and the larvae  
971 respond depending on the initial conditions of the vials (food level and density). For males, food level  
972 (mg/larva) is also the most important factor, but density, total food per vial and competition  
973 (interactions) are relatively more important than for females. Male larvae are also affected by the  
974 number and behavior of female larvae. Male larvae filter particles and pass them through their guts,  
975 extracting the most available nutrients; they do not appear to change this feeding strategy to retain  
976 particles at the expense of their growth rate, as female larvae do. Males in the vials with the least  
977 competition grow fastest, and pupate at large sizes, especially the nonPrime males, which pupate at  
978 masses larger than the Prime male in each vial. This indicates a release from competition for the non-  
979 Prime males when the Prime male pupates. Males in the vials with the least total food experience a  
980 reduction in food particles when the females begin retaining food and develop a similar compressed size  
981 distribution to those females. They pupate relatively early and at a relatively small size (not the  
982 smallest, but close). Males in the vials with the most competition pupate earlier and at smaller sizes

983 than in any other vials; they appear to have less food available to them than those in the vials with the  
984 least total food, despite equivalent initial food/larva. The quality and quantity of particles is reduced by  
985 the behavior of the female larvae and this causes the males to pupate early and at a small size. In the  
986 vials with the most total food, Prime males grow to their largest sizes and delay pupation by a day to  
987 attain that size. Average males grow large as well, but not as large as they do in the vials with the least  
988 competition. This is possibly because of the delay in pupation by the Prime male; there may be a time  
989 constraint on pupation that reduces the benefit from the release of competition observed in the vials  
990 with the least competition.

991

## 992 Competition between males and females

993 Female mosquito larvae grow to be larger than male larvae in similar larval environments. Across the  
994 experiment, some Prime and Average males are larger than some Prime and Average females, but  
995 within any vial, the Prime and Average female masses at pupation are always larger than the  
996 corresponding Prime and Average male masses (Tables 4C, 4E, 4F, 4H). Comparing the pupal masses  
997 across treatment combinations in the interactions shows a larger difference in size between females and  
998 males (Prime vs Prime, Average vs Average) in the high food/larva treatments than in the low food/larva  
999 treatments. In the F2 X D1 interaction the difference in size parallels the results of the female mass: the  
1000 largest difference is in the vials with the least competition and the smallest difference is in the vials with  
1001 the least total food. These treatments are both at the low Density (4 larvae/vial). The vials with 5 larvae  
1002 show intermediate differences between the females and males, with the higher Food level also having  
1003 the greater size difference. In the F1 X D3 and F2 X D3 interactions the greatest differences in size  
1004 between the females and males are in the high Density (7 or 8 larvae) vials with the most total food, and  
1005 the smallest differences are in the high Density (7 or 8 larvae) vials with the most competition. All these  
1006 differences reflect the mass of females; in vials where the females grow largest, the difference between

1007 males and females is largest, and in vials where the females are the smallest, the difference between  
1008 males and females is also smallest. This shows up in the MANOVA and the ANOVA r squared results  
1009 (females are affected by Food level more than males). Females vary in size according to Food level and  
1010 total food per vial with competition limiting pupal mass at high densities. Males vary less in size than  
1011 females and they are smaller and pupate earlier. Males also vary in size according to Food level and  
1012 total food per vial, but Density and interactions account for 50 % or more of the variance, and  
1013 competition is important at both low densities and high densities, at least for the non-Prime males.  
1014 Within the limits of these experiments, females control the availability of food; males, especially the  
1015 Prime male, escape competition by growing as rapidly as possible and pupating as the available food  
1016 decreases.

1017  
1018 In the F1 X D3 interaction, the difference between Prime females and Prime males in the vials with the  
1019 least competition is as great as that difference in the vials with the most food. Prime males and females  
1020 grow at the fastest rate in the vials with the least competition; these vials are expected to be the  
1021 optimal conditions for the larvae within this experiment. The large difference in size between the Prime  
1022 female and the Prime male in these vials is the result of optimal growth. Both Prime females and Prime  
1023 males grow larger in the vials with the most food per vial, but the difference between them remains the  
1024 same. This suggests that even at very high total Food levels there is an optimal largest size for both  
1025 males and females. Furthermore, the incremental size between Prime females in the vials with the least  
1026 competition and those in the vials with the most food is only 0.08 mg, while the incremental size  
1027 between males in the corresponding vials is only 0.10 mg. Prime females delay pupation for 1.53 days  
1028 to achieve this incremental growth and Prime males delay it for 0.73 days.

1029



1030 Again, in the F1 X D3 interaction, the difference between the Prime females and Prime males in the vials  
1031 with the least food per vial is as small as that difference in the vials with the most competition. From  
1032 the second experiment we know that the Prime male benefits from higher percent males under the  
1033 conditions in the vials with the least food per vial and that the nonPrime males are smaller. The  
1034 differences between the Prime females and Prime males in these two treatments are smaller than in any  
1035 other vials across all three interactions. The sizes of the Prime female and Prime male in the vials with  
1036 the most competition is even lower than their sizes in the vials with the least total food. This suggests  
1037 that competition in these vials has a greater deleterious effect on growth than a lower total food per  
1038 vial, which compresses the size distribution of both males and females. In the vials with the most  
1039 competition, the size distribution is comparable to the other vials at high Density; this means that the  
1040 non-Prime males and non-Prime females are reduced in size by competition more than they are in the  
1041 vials with the least total food.

1042

1043 If there were interference competition between males and females, the size distributions should be  
1044 larger at lower Food levels rather than smaller as observed. Competition between males and females is  
1045 exploitative, but females control the food resource in two ways: female larvae grow larger than males  
1046 and dominate the competition for particles by filtering faster; and female larvae retain food particles  
1047 when food becomes relatively scarce so that the available particles become even scarcer. The Prime  
1048 male pupates within 5 to 6 days after hatching except when food availability is high and it extends larval  
1049 growth to increase in size at the expense of its growth rate. The Average male grows to a size dictated  
1050 by the initial Food level and competition. The Prime female pupates within 6 to 8 days after hatching  
1051 except when Density is high and it extends its larvae growth. Two of these exceptions are at the highest  
1052 Density and lowest Food levels (most competition) and two of them are at the highest densities and  
1053 highest Food level (most total food), so there are potentially different causes for the extension in larval

1054 growth among females. The Average female mass at pupation reflects the growth patterns of the Prime  
1055 female.

1056

1057 Mosquito larvae do not grow in a smooth curve; each of the 4 instars grows within the constraints of a  
1058 larval exoskeleton, which is shed at the subsequent molt (see [58,63]). The two observed size  
1059 distributions (compressed in the vials with the least total food, larger size distributions in the other vials)  
1060 suggest that the female larvae in the vials with the least total food switch to retention in the third instar  
1061 or earlier, while the rest of the vials do not experience the lowered food particle levels that trigger  
1062 retention until sometime in the 4th instar. Most of the competition will then occur in the 4th instar for  
1063 both males and females. Mosquito larvae do not display obvious secondary sex characteristics, but  
1064 there is a bimodal size dimorphism among older (4th instar) larvae and larger larvae are usually female.  
1065 By the beginning of the 4th instar at least, female mosquito larvae already have developed a  
1066 competitive advantage over the males [70,72].

1067

## 1068 Interference competition

1069 The distribution of sizes among males and among females is another measure of competition (besides  
1070 the absolute size). In tadpoles, low size and a large difference between the Prime and Average tadpoles  
1071 indicated that interference competition mechanisms replaced exploitative competition at low food  
1072 levels [30,31,98,99]. Rubenstein's [100] data suggest similar interference competition among Pygmy  
1073 Sunfish in the lab experiments, but not in the field trials.

1074

1075 There is no such pattern comparing Prime male to Average male mass, Prime female to Average female  
1076 mass, Prime female to Prime male mass, or Average female to Average male mass across the three main  
1077 interactions. The differences between Prime male and Average male, and Prime female and Average

1078 female are smallest in the vials with the least food per vial; interference competition would produce a  
1079 larger difference between the Prime and Average individuals in these vials. Differences between sexes  
1080 are also lower at the lower food levels rather than higher, so competition appears to be purely  
1081 exploitative. However, there are differences in the patterns for males and females, suggesting that they  
1082 are competing differently for the food resource.

1083

1084 Interference competition among *A. aegypti* larvae has been postulated based on “Growth Retardant  
1085 Factor (GRF)” in conditioned water[16,41,43,45,56,101], but see [47]. That water conditioned by rearing  
1086 mosquito larvae in it negatively affects the growth and/or survival of subsequent larvae is insufficient to  
1087 conclude that there is interference competition among the larvae; evidence of reduced size of the  
1088 original competitors and a larger difference between the Prime and Average pupae of each species is  
1089 necessary as well. I did not observe interference competition in my experiments, but it is possible that  
1090 the strain of *Aedes aegypti* that I collected did not produce the GRF observed in other experiments (see  
1091 [47,101]).

1092

## 1093 The effects of food and density

1094 Mosquito larval growth determines the size of the adult mosquito. Microcosm experiments allow the  
1095 manipulation of external factors that influence larval growth and reveal the effects and interactions  
1096 among those factors. In these experiments the factors were food level (mg/larva), density (larvae/vial),  
1097 and sex ratio (% males/vial), and the interactions showed the contributions of competition and total  
1098 food/vial. There were clear differences between the responses of male and female larvae to the initial  
1099 conditions of food level and density and to competition and the total food/vial. Females dominate  
1100 competition for food particles in these experiments, but the responses of both males and females were  
1101 more complex than prior investigations predicted.

1102

1103 Investigations of the larval ecology of *A. aegypti* have held the total food level constant and varied the  
1104 density of larvae [4,7,10,33,36,47,63,75,90,96,102-107]. Others varied food level at a constant density  
1105 of larvae [3,24,25,35,38-40,55,62,68,76,82,92,108] or varied volume and surface area while keeping the  
1106 number of individuals and food level constant [40,82]. Greenough et al. [32] varied the number of  
1107 individuals while keeping total food and volume proportional to the number of individuals. Serpa et al.  
1108 [109] varied number of individuals but decreased both food and volume as the number of individuals  
1109 increased. Mitchell-Foster et al. [110] and Price et al. [87] also increased density and decreased food at  
1110 the same time. While none of these investigations contradicts the results of my experiments, none of  
1111 them can be used as direct support because their designs do not allow the possibility of an interaction  
1112 between food and density.

1113

1114 Other investigators varied both food level and density [2,15,17-22,26,27,34,79]; these data show that  
1115 food level interacts with larval density affecting the outcome of larval growth. Some of these prior  
1116 studies demonstrate differences between males and females [2,15,17,20,21,32,33,79], but only Wada  
1117 [15], Daugherty et al. [2], Agnew et al. [20], Bedhomme et al. [21], Kim & Muturi [79], and my own  
1118 results indicate that the effect of the interaction between food level and density differs for males and  
1119 females.

1120

1121 *Aedes aegypti* larvae occur in nature in low numbers spread across multiple small containers [2-13,111],  
1122 but see [14]. There are likely to be only a small number of winners in each of these competitive arenas  
1123 and the Prime male and Prime female are proposed as good proxies for these ecological and  
1124 evolutionary winners. Average values of pupal size and age at pupation are not the best estimates of  
1125 the outcome of competition in the containers. The mosquito larvae react to their environmental

1126 conditions including: food level (food/larva), total food (food/container), density (larvae/container), and  
1127 competitive interactions differently depending on gender as well as these conditions. The outcomes  
1128 form a complex pattern over the conditions tested, which were preselected for non-lethal competition.  
1129 Based on the complexity of the observed responses to the environmental conditions, it would be unwise  
1130 to infer that these results predict the outcomes beyond the experimental design; these mosquito larvae  
1131 appear to behave in a complex and reproducible way despite the simplicity of the experimental  
1132 treatments.

1133

1134 Other investigators have identified additional environmental conditions that affect the growth and  
1135 survival of *A. aegypti* as larvae: temperature, temperature fluctuations, other food sources, pesticides,  
1136 pollutants, parasites, predators, and competitors (see above). Furthermore, adult behavior and the  
1137 ability of *A. aegypti* eggs to remain quiescent despite repeated inundations [7,10,112–119] complicate  
1138 the natural history of this species and suggest that its resilience, invasiveness and association with  
1139 human habitation may be due to multiple feedback cycles that allow a small, diffuse population to  
1140 rebound repeatedly after eradication attempts.

1141 Studies on other mosquitoes, especially those of interspecific competition among larvae of similar  
1142 species, suggest that there may be significant differences in the ecology, physiology, and behavior of  
1143 even congeneric mosquito larvae as compared to *Aedes aegypti*. (*Aedes albopictus* —  
1144 [26,34,63,67,68,75,79,89,93,94,104,106,111,112,120-145]; *Aedes sierrensis*—[146–153]; *Aedes*  
1145 *triseriatus*—[154-179].

1146

## 1147 Implications for vector control

1148 *Aedes aegypti* larvae respond to the amount of food and larval density in their containers such that low  
1149 densities of larvae will produce larger pupae of both sexes compared to higher densities at any given

1150 food level (mg/larva). This suggests that vector control efforts to reduce the adult population may result  
1151 in lower numbers of larvae in subsequent generations and thus larger pupae and adults.  
1152 Larger adults may be more robust and longer lived than smaller ones and larger females may take larger  
1153 blood meals, produce more and larger eggs, [1,81,92] and possibly survive to take a second blood meal  
1154 [91]. Each subsequent blood meal is an opportunity for the transmission of Zika, Dengue, Yellow Fever  
1155 or other diseases transmissible by *A. aegypti*. Adult females bite multiple times per blood meal in the  
1156 laboratory (personal observations), so a female may be able to transmit a virus from one individual to  
1157 another even during the initial blood feeding cycle. There may be a difference in risk to human health  
1158 between a large population of small mosquitoes versus a smaller population of larger mosquitoes, but  
1159 neither option is desirable. The best outcome of control efforts may be to remove larval habitat rather  
1160 than to attempt to control adult populations.

1161

## 1162 Implications for mosquito ecology

1163 Many investigators have asserted that *Aedes aegypti* larvae are food limited in their normal  
1164 environment and some investigators have observed this to be true [3,37,180–182]. Other investigators  
1165 have observed that *A. aegypti* larvae are not always food limited in their normal environment  
1166 [4,7,10,183,184].

1167

1168 *Aedes aegypti* exhibits a number of ecological adaptations that make it resilient in the face of an  
1169 uncertain environment. In addition to the competitive responses of the larvae to food and density,  
1170 which consistently produce early maturing males and larger, later females, the larvae can survive  
1171 without food for long periods waiting for additional food input so as to complete four instars and pupate  
1172 (almost 25 days for a 4th instar larvae at 20 C, less for earlier instars and higher temperatures, [74]; see  
1173 also [18,75,183]. Adults can survive on sucrose, a nectar substitute, in the lab for 80-105 days

1174 [86,108,138,185]. Adult females require a blood meal to mature eggs. The size of the adult female is  
1175 directly related to the size of the pupa and reflects the competitive success of the larva; large females  
1176 take larger blood meals, mature more and larger eggs, and live longer than small females  
1177 [1,4,18,23,35,58,70,81,83,84,86,104,110,129,186,187], but see [35], and may be more effective disease  
1178 vectors [88–91], but see [92–97,188] although this is likely a result of their robustness rather than a  
1179 direct result of size selection. Larger eggs hatch into larger larvae and start their lives with an advantage  
1180 [54]. Large females may also fly further than small females, so may have more oviposition sites  
1181 (containers) available to them [86,187], but see [35]. Recaptured adult females fly as far as 200 m [35]  
1182 from their release point (but see [86] for lab flight potential >1 km); longer distance dispersal may be  
1183 primarily as eggs in containers transported by humans [118,189]. However, small females may also  
1184 mature large eggs, giving their offspring an advantage similar to that of large females [54,81]. Females  
1185 deposit their eggs individually and may use multiple containers; the criteria that female *A. aegypti* use to  
1186 select the containers and to allocate the number of eggs across containers includes presence of  
1187 conspecific larvae and pupae, container fill method, container size, lid, and sun exposure [8,60,113] and  
1188 the presence of other species' larvae and pupae [118]. Another factor in the resilience of this species is  
1189 the ability of eggs to survive for some time until they are inundated, and the additional feature that not  
1190 all of the eggs hatch during the first inundation, forming a reserve egg pool in the event that the initial  
1191 hatch is unsuccessful [7,10,112–119].

1192

1193 Adult male *A. aegypti* emerge before their sisters. This may reduce inbreeding in this species composed  
1194 of many small localized populations (spatially and temporally). Size seems to be less important to males  
1195 than to females [1,54], but larger males produce more and better sperm (and seminal fluid proteins) and  
1196 live longer than smaller males [35,185,190], but see [191]. There doesn't seem to be size selection at  
1197 mating for either males or females [1] suggesting that low population densities and short adult lives

1198 constrain the opportunities for mating and offset any advantage that size selection might confer.  
1199 Despite this, there is a clear positive feedback effect reinforcing the value of large size at every life cycle  
1200 stage.  
1201  
1202 *Aedes aegypti* can survive for relatively long periods as eggs, starving larvae, or sugar feeding adults  
1203 while waiting for an opportunity to hatch, feed, mate, and blood feed, so as to progress to the next  
1204 stage of the life cycle. Large size confers an advantage to eggs, larvae and adults, but since size is a  
1205 plastic response to larval conditions, it doesn't seem to affect mating preference (but see [37] on the  
1206 heritability of size). Timmermann & Briegel [71], and Price et al. [87] suggest that two mosquitoes of the  
1207 same size with different larval (nutritional) histories may not be equal, with differences in their internal  
1208 reserves and metabolic capacities. The physiology of nutrient accumulation and its relationship to the  
1209 hormonal triggering of pupation have been studied, but the results seem contradictory (see above). The  
1210 ecological evidence and the results of the current study suggest that these physiological triggers  
1211 (responses to environmental conditions) might be much more complex than currently understood. In  
1212 the current study, the initiation of pupation appeared to be affected by food level (quantity and quality  
1213 of particles), larval density, total food/vial and competitive interactions with other larvae, as well as by  
1214 larval mass, nutritional history (inferred) and sex. Larval competition appears to be more important to  
1215 determining pupal size and timing for males, while food level and total food/vial appear to be more  
1216 important to females. Furthermore, these environmental factors may change the triggers for pupation  
1217 in different ways for each of the sexes. Two other factors that may influence pupation are the  
1218 distribution of sizes within each sex (the difference between the Prime and nonPrime individuals), and  
1219 the absolute size for large females (i.e. there may be a maximum size at any set of ecological conditions:  
1220 temperature, food type, larval density, etc.).  
1221



## 1222 Evolution

1223 This species has been spread globally by inadvertent human activity and has been actively eradicated for  
1224 decades. Nevertheless, it persists in small, relatively isolated, and impermanent populations using  
1225 various water-filled containers as a larval resource and vertebrate hosts as an adult protein resource to  
1226 produce eggs. Differences in strains have been observed [18,101,192], but de Lourdes Munoz et al.  
1227 [193] found that proximity did not result in genetic similarity along an 800 km range. The evolutionary  
1228 implication is that this species retains its identity globally despite expected allopatric pressure to diverge  
1229 because of continued transport and reintroduction by human activity.

1230

## 1231 Acknowledgements

1232 I would like to thank Dr. J. H. Frank for his advice and encouragement. Drs. W. Bradshaw, J. R. Linley, L.  
1233 P. Lounibos, G. F. O'Meara, J. M. Werts and Mr. J. G. White also read the manuscript and offered helpful  
1234 suggestions. The research was carried out while I was supported by an NIH/NIAID post-doctoral  
1235 fellowship (AI-06088) at the Florida Medical Entomology Laboratory. I am grateful to Dr. Werts and the  
1236 Department of Zoology at Duke University for computer time. My late partner, Richard O. Merritt,  
1237 provided financial support to allow me to complete the paper after many years delay. My present  
1238 partner, Dr. Douglas Kline, provided encouragement, editing and technical guidance in the completion of  
1239 the task.

1240

## 1241 References

- 1242 1. Steinwascher K. Relationship Between Pupal Mass and Adult Survivorship and Fecundity for  
1243 *Aedes aegypti*. *Environ Entomol.* 1982;11: 150–153. doi:10.1093/ee/11.1.150
- 1244 2. Daugherty MP, Alto BW, Juliano S a. Invertebrate carcasses as a resource for competing *Aedes*  
1245 *albopictus* and *Aedes aegypti* (Diptera: Culicidae). *J Med Entomol.* 2000;37: 364–372.  
1246 doi:10.1603/0022-2585(2000)037[0364:ICAARF]2.0.CO;2
- 1247 3. Barrera R, Amador M, Clark GGG. Ecological Factors Influencing *Aedes aegypti* (Diptera :  
1248 Culicidae) Productivity in Artificial Containers in Salinas, PuertoRico. *JMedEntomol.* 2006;43:  
1249 234–239. doi:10.1093/jmedent/43.3.484
- 1250 4. Maciá A. Differences in performance of *Aedes aegypti* larvae raised at different densities in tires  
1251 and ovitraps under field conditions in Argentina. *J Vector Ecol.* 2006;31: 371–377.  
1252 doi:10.3376/1081-1710(2006)31[371:dipoaa]2.0.co;2
- 1253 5. Juliano SA. Species Interactions Among Larval Mosquitoes: Context Dependence Across Habitat  
1254 Gradients. *Annu Rev Entomol.* 2009;54: 37–56. doi:10.1146/annurev.ento.54.110807.090611
- 1255 6. Murrell EG, Damal K, Lounibos LP, Juliano SA. Distributions of Competing Container Mosquitoes  
1256 Depend on Detritus Types, Nutrient Ratios, and Food Availability. *Ann Entomol Soc Am.*  
1257 2011;104: 688–698. doi:10.1603/AN10158.Distributions
- 1258 7. Walsh RK, Facchinelli L, Ramsey JM, Bond JG, Gould F. Assessing the impact of density  
1259 dependence in field populations of *Aedes aegypti*. *J Vector Ecol.* 2011;36: 300–307.  
1260 doi:10.1111/j.1948-7134.2011.00170.x
- 1261 8. Wong J, Morrison AC, Stoddard ST, Astete H, Chu YY, Baseer I, et al. Linking oviposition site  
1262 choice to offspring fitness in *Aedes aegypti*: Consequences for targeted larval control of dengue  
1263 vectors. *PLoS Negl Trop Dis.* 2012;6: 1–12. doi:10.1371/journal.pntd.0001632
- 1264 9. Getachew D, Tekie H, Gebre-Michael T, Balkew M, Mesfin A. Breeding sites of *aedes aegypti*:  
1265 Potential dengue vectors in dire Dawa, east Ethiopia. *Interdiscip Perspect Infect Dis.* 2015;2015.  
1266 doi:10.1155/2015/706276
- 1267 10. Walsh RK, Aguilar CL, Facchinelli L, Valerio L, Ramsey JM, Scott TW, et al. Regulation of *aedes*  
1268 *aegypti* population dynamics in field systems: Quantifying direct and delayed density  
1269 dependence. *Am J Trop Med Hyg.* 2013;89: 68–77. doi:10.4269/ajtmh.12-0378
- 1270 11. Tsunoda T, Cuong TC, Dong TD, Yen NT, Le NH, Phong TV, et al. Winter refuge for *Aedes aegypti*  
1271 and *Ae. albopictus* mosquitoes in Hanoi during winter. *PLoS One.* 2014;9.  
1272 doi:10.1371/journal.pone.0095606
- 1273 12. Camara DCP, Codeço CT, Juliano SA, Lounibos LP, Riback TIS, Pereira GR, et al. Seasonal  
1274 differences in density but similar competitive impact of *aedes albopictus* (Skuse) on *aedes*  
1275 *aegypti* (L.) in rio de janeiro, Brazil. *PLoS One.* 2016;11: 1–15. doi:10.1371/journal.pone.0157120
- 1276 13. Fader JE, Juliano SA. An empirical test of the aggregation model of coexistence and consequences  
1277 for competing container-dwelling mosquitoes Published by : Ecological Society of America Stable

- 1278 URL : <http://www.jstor.org/stable/23435994> REFERENCES Linked references are availabl.  
1279 Ecology. 2016;94: 478–488.
- 1280 14. Ferdousi F, Yoshimatsu S, Ma E, Sohel N, Wagatsuma Y. Identification of Essential Containers for  
1281 Aedes Larval Breeding to Control Dengue in Dhaka, Bangladesh. Trop Med Health. 2015;43.  
1282 doi:10.2149/tmh.2015-16
- 1283 15. Wada Y. Effects of larval density on the development of *Aedes aegypti* (L.) and the size of adults.  
1284 Quaest Entomol. 1965;1: 223–249.
- 1285 16. Moore CG, Fisher BR. Competition in Mosquitoes. Density and Species Ratio Effects on Growth,  
1286 Mortality, Fecundity and Production of Growth Retardant. Ann Entomol Soc Am. 1969;62: 1325–  
1287 1331.
- 1288 17. Gilpin ME, McClelland GAH. Systems Analysis of the Yellow Fever Mosquito *Aedes aegypti*.  
1289 Fortschritte Zool. 1979;25: 355–388.
- 1290 18. Saul SH, Novak RJ, Ross QE. The Role of the Preadult Stages in the Ecological Separation of Two  
1291 Subspecies of *Aedes aegypti*. Am Midl Nat. 1980;104: 118–134.
- 1292 19. Juliano SA. Species Introduction and Replacement among Mosquitoes : Interspecific Resource  
1293 Competition or Apparent Competition ? Ecology. 1998;79: 255–268. doi:10.1890/0012-  
1294 9658(1998)079[0255:SIARAM]2.0.CO;2
- 1295 20. Agnew P, Hide M, Sidobre C, Michalakis Y. A minimalist approach to the effects of density-  
1296 dependent competition on insect life-history traits. Ecol Entomol. 2002;27: 396–402.  
1297 doi:10.1046/j.1365-2311.2002.00430.x
- 1298 21. Bedhomme S, Agnew P, Sidobre C, Michalakis Y. Sex-specific reaction norms to intraspecific larval  
1299 competition in the mosquito *Aedes aegypti*. J Evol Biol. 2003;16: 721–730. doi:10.1046/j.1420-  
1300 9101.2003.00576.x
- 1301 22. Antonaci Gama R, De Carvalho Alves K, Ferreira Martins R, Eiras ÁE, Carvalho De Resende M.  
1302 Efeito da densidade larval no tamanho de adultos de *Aedes aegypti* criados em condições de  
1303 laboratório. Rev Soc Bras Med Trop. 2005;38: 64–66. doi:10.1590/S0037-86822005000100014
- 1304 23. Telang A, Frame L, Brown MR. Larval feeding duration affects ecdysteroid levels and nutritional  
1305 reserves regulating pupal commitment in the yellow fever mosquito *Aedes aegypti* (Diptera:  
1306 Culicidae). J Exp Biol. 2007;210: 854–864. doi:10.1242/jeb.02715
- 1307 24. Murrell EG, Juliano SA. Detritus type alters the outcome of interspecific competition between  
1308 *Aedes aegypti* and *Aedes albopictus* (Diptera: Culicidae). J Med Entomol. 2008;45: 375–83.  
1309 doi:10.1093/jmedent/45.3.375
- 1310 25. Padmanabha H, Bolker B, Lord CC, Lounibos LP, Rubio C, Lounibos LP. Food Availability Alters the  
1311 Effects of Larval Temperature on *Aedes aegypti* Growth. J Med Entomol. 2011;48: 974–984.  
1312 doi:10.3174/ajnr.A1256.Functional
- 1313 26. Couret J, Dotson E, Benedict MQMQ. Temperature, larval diet, and density effects on  
1314 development rate and survival of *Aedes aegypti* (Diptera: Culicidae). Oliveira PL, editor. PLoS  
1315 One. 2014;9: 1–15. doi:10.1371/journal.pone.0087468

- 1316 27. Riback TIS, Honório NA, Pereira RN, Godoy WAC, Codeço CT. Better to be in bad company than to  
1317 be alone? *Aedes* vectors respond differently to breeding site quality in the presence of others.  
1318 *PLoS One*. 2015;10: 1–16. doi:10.1371/journal.pone.0134450
- 1319 28. Chiang HC, Hodson AC. An Analytical Study of Population Growth in *Drosophila melanogaster*.  
1320 *Ecol Monogr*. 1950;20: 173–206.
- 1321 29. Wilbur HM. Interactions of Food Level and Population Density in *Rana Sylvatica*. *Ecology*.  
1322 1977;58: 206–209.
- 1323 30. Steinwascher K. Interference and Exploitation Competition Among Tadpoles of *Rana Utricularia*.  
1324 *Ecology*. 1978;59: 1039–1046. doi:10.2307/1938556
- 1325 31. Steinwascher K. Competitive Interactions among Tadpoles : Responses to Resource Level.  
1326 *Ecology*. 1979;60: 1172–1183. doi:10.2307/1936965
- 1327 32. Greenough NC, Peters TM, Barbosa P. Effects of Crowding in Larval *Aedes aegypti*, Using  
1328 Proportionally Reduced Experimental Universes. *Ann Entomol Soc Am*. 1971;64: 26–29.
- 1329 33. Barbosa P, Peters TM, Greenough NC. Overcrowding of Mosquito Populations: Responses of  
1330 Larval *Aedes aegypti* to Stress 2. *Environ Entomol*. 1972;1: 89–93. doi:10.1093/ee/1.1.89
- 1331 34. Lounibos LP, Suárez S, Menéndez Z, Nishimura N, Escher RL, O’Connell SM, et al. Does  
1332 temperature affect the outcome of larval competition between *Aedes aegypti* and *Aedes*  
1333 *albopictus*? *J Vector Ecol*. 2002;27: 86–95. Available:  
1334 [http://www.sove.org/Society\\_for\\_Vector\\_Ecology/Journal/Entries/2002/6/1\\_Volume\\_27,\\_Number\\_1\\_files/Lounibosetal.pdf](http://www.sove.org/Society_for_Vector_Ecology/Journal/Entries/2002/6/1_Volume_27,_Number_1_files/Lounibosetal.pdf)  
1335
- 1336 35. Maciel-De-Freitas R, Codeço CT, Lourenço-De-Oliveira R. Body size-associated survival and  
1337 dispersal rates of *Aedes aegypti* in Rio de Janeiro. *Med Vet Entomol*. 2007;21: 284–292.  
1338 doi:10.1111/j.1365-2915.2007.00694.x
- 1339 36. Macia A. Effects of larval crowding on development time , survival and weight at metamorphosis  
1340 in *Aedes aegypti* ( Diptera : Culicidae ). *Recibido*. 2009;68: 107–114.
- 1341 37. Schneider JR, Chadee DD, Mori A, Romero-Severson J, Severson DW. Heritability and adaptive  
1342 phenotypic plasticity of adult body size in the mosquito *Aedes aegypti* with implications for  
1343 dengue vector competence. *Infect Genet Evol*. 2011;11: 11–16. doi:10.1007/s10955-011-0269-  
1344 9.Quantifying
- 1345 38. Bara JJ, Clark TM, Remold SK. Utilization of larval and pupal detritus by *Aedes aegypti* and *Aedes*  
1346 *albopictus*. *J Vector Ecol*. 2014;39: 44–47. doi:10.1111/j.1948-7134.2014.12068.x
- 1347 39. Bara JJ, Montgomery A, Muturi EJ. Sublethal effects of atrazine and glyphosate on life history  
1348 traits of *Aedes aegypti* and *Aedes albopictus* (Diptera: Culicidae). *Parasitol Res*. 2014;113: 2879–  
1349 2886. doi:10.1007/s00436-014-3949-y
- 1350 40. Vasquez VA. Comparative larval development of *Culex pipiens* L. and *Aedes aegypti* (L.); the  
1351 influence of food, space and light. University of Massachusetts. 1966.
- 1352 41. Ikeshoji T, Mulla MS. Overcrowding factors of mosquito larvae. *J Econ Entomol*. 1970;63: 90–96.

- 1353 42. Ikeshoji T, Mulla MS. Overcrowding factors of mosquito larvae: Isolation and chemical  
1354 identification. *Environ Entomol.* 1974;3: 482–486.
- 1355 43. Ikeshoji TM, Mulla MS. Overcrowding factors of mosquito larvae. 2. Growth-retarding and  
1356 bacteriostatic effects of the overcrowding factors of mosquito larvae. *J Econ Entomol.* 1970;63:  
1357 1737–1743.
- 1358 44. Ikeshoji T, Mulla MS. Overcrowding Factors of Mosquito Larvae: Activity of Branched Fatty Acids  
1359 Against Mosquito Larvae. *Environ Entomol.* 1974;3: 487–491. doi:10.1093/ee/3.3.487
- 1360 45. Moore CG, Whitacre DM. Competition in Mosquitoes. 2. Production of *Aedes aegypti* Larval  
1361 Growth Retardant at Various Densities and Nutrition Levels. *Ann Entomol Soc Am.* 1972;65: 915–  
1362 918. doi:10.1093/aesa/65.4.915
- 1363 46. Nekarsova LS. Effect of products of the active life of mosquito larvae on their growth and  
1364 development. *Dokl Biol Sci.* 1974;218: 403–405.
- 1365 47. Dye C. Intraspecific competition amongst larval *Aedes aegypti*: food exploitation or chemical  
1366 interference? *Ecol Entomol.* 1982;7: 39–46. doi:10.1111/j.1365-2311.1982.tb00642.x
- 1367 48. Howland LJ. The nutrition of mosquito larvae, with special reference to their algal food. *Bull*  
1368 *Entomol Res.* 1930;21: 431–439.
- 1369 49. Christophers SR. *Aedes aegypti* (L.). The yellow fever mosquito, its life history, bionimics and  
1370 structure. Cambridge, Englad: Cambridge University Press; 1960.
- 1371 50. Pucat AM. The functional morphology of the mouthparts of some mosquito larvae. *Quaest*  
1372 *Entomol.* 1965;1: 41–86.
- 1373 51. Dadd RH. Relationship between Filtering Activity and Ingestion of Solids by Larvae of the  
1374 Mosquito *Culex Pipiens*: A Method for Assessing Phagostimulant Factors. *J Med Entomol.* 1970;7:  
1375 708–712.
- 1376 52. Wassersug RJ. The adaptive significance of the tadpole stage with comments on the maintenance  
1377 of complex life cycles in anurans. *Am Zool.* 1975;15: 405–417.
- 1378 53. Levi T, Ben-Dov E, Shahi P, Borovsky D, Zaritsky A. Growth and development of *Aedes aegypti*  
1379 larvae at limiting food concentrations. *Acta Trop.* 2014;133.  
1380 doi:10.1016/j.actatropica.2014.02.001
- 1381 54. Steinwascher K. Egg Size Variation in *Aedes aegypti* : Relationship to Body Size and Other  
1382 Variables. *Am Midl Nat.* 1984;112: 76–84.
- 1383 55. Koella JC, Offenber J. Food availability and parasite infection influence the correlated responses  
1384 of life history traits to selection for age at pupation in the mosquito *Aedes aegypti*. *J Evol Biol.*  
1385 1999;12: 760–769.
- 1386 56. Bédhomme S, Agnew P, Sidobre C, Michalakakis Y. Pollution by conspecifics as a component of  
1387 intraspecific competition among *Aedes aegypti* larvae. *Ecol Entomol.* 2005;30: 1–7.  
1388 doi:10.1111/j.0307-6946.2005.00665.x
- 1389 57. Mokany A, Mokany A, Shine R, Shine R. Pond attributes in uence competitive interactions

- 1390 between tadpoles and mosquito larvae. *J Med Entomol.* 2006; 396–404.
- 1391 58. Koenraadt CJM. Pupal dimensions as predictors of adult size in fitness studies of *Aedes aegypti*  
1392 (Diptera: Culicidae). *J Med Entomol.* 2008;45: 331–336. doi:10.1603/0022-  
1393 2585(2008)45[331:pdapoa]2.0.co;2
- 1394 59. Mohammed A, Chadee DD. Effects of different temperature regimens on the development of  
1395 *Aedes aegypti* (L.) (Diptera: Culicidae) mosquitoes. *Acta Trop.* 2011;119: 38–43.  
1396 doi:10.1016/j.actatropica.2011.04.004
- 1397 60. Kokkinn MJ, Roberts DM, Williams CR. Larval development rate of the mosquitoes *Culex*  
1398 *quinquefasciatus* and *Aedes aegypti* (Diptera: Culicidae) varies between clutches: Implications for  
1399 population ecology. *Aust J Entomol.* 2012;51: 22–27. doi:10.1111/j.1440-6055.2011.00837.x
- 1400 61. Padmanabha H, Correa F, Legros M, Nijhout HF, Lord C, Lounibos LP. An eco-physiological model  
1401 of the impact of temperature on *Aedes aegypti* life history traits. *J Insect Physiol.* Elsevier Ltd;  
1402 2012;58: 1597–1608. doi:10.1016/j.jinsphys.2012.09.015
- 1403 62. Buckner EA, Alto BW, Lounibos LP. Larval temperature-food effects on adult mosquito infection  
1404 and vertical transmission of dengue-1 virus. *J Med Entomol.* 2016;53: 91–98.  
1405 doi:10.1093/jme/tjv145
- 1406 63. Noden BH, O’Neal PA, Fader JE, Juliano SA. Impact of inter- and intra-specific competition among  
1407 larvae on larval, adult, and life-table traits of *Aedes aegypti* and *Aedes albopictus* females. *Ecol*  
1408 *Entomol.* 2016;41: 192–200. doi:10.1111/een.12290
- 1409 64. Morrison DF. *Multivariate Statistical Methods.* New York: McGraw-Hill Book Company; 1967.
- 1410 65. Timm NH. *Multivariate Analysis.* Monterey, California: Brooks/Cole Publishing Company; 1975.
- 1411 66. Merritt RW, Dadd RH, Walker ED. Feeding Behavior, Natural Food, and Nutritional Relationships  
1412 of Larval Mosquitoes. *Annu Rev Entomol.* 1992;37: 349–374.  
1413 doi:10.1146/annurev.en.37.010192.002025
- 1414 67. Yee DA, Kesavaraju B, Juliano SA. Interspecific Differences in Feeding Behavior and Survival Under  
1415 Food-Limited Conditions for Larval *Aedes albopictus* and *Aedes aegypti* (Diptera: Culicidae). *Ann*  
1416 *Entomol Soc Am.* 2004;97: 720–728. doi:10.1603/0013-8746(2004)097[0720:IDIFBA]2.0.CO;2
- 1417 68. Reiskind MH, Janairo MS. Late-instar Behavior of *Aedes aegypti* (Diptera: Culicidae) Larvae in  
1418 Different Thermal and Nutritive Environments. *J Med Entomol.* 2015;52: 789–796.  
1419 doi:10.1093/jme/tjv088
- 1420 69. Porter KG. The plant-animal interface in freshwater ecosystems. *Am Sci.* 1977;65: 159–170.
- 1421 70. Chambers GM, Klowden MJ. Correlation of nutritional reserves with a critical weight for pupation  
1422 in larval *Aedes aegypti* mosquitoes. *J Am Mosq Control Assoc.* 1990;6: 394–399.
- 1423 71. Timmermann SE, Briegel H. Larval growth and biosynthesis of reserves in mosquitoes. *J Insect*  
1424 *Physiol.* 1999;45: 461–470. doi:10.1016/S0022-1910(98)00147-4
- 1425 72. Nishiura JT, Burgos C, Aya S, Goryacheva Y, Lo W. Modulation of larval nutrition affects midgut  
1426 neutral lipid storage and temporal pattern of transcription factor expression during mosquito

- 1427 metamorphosis. *J Insect Physiol.* 2007;53: 47–58. doi:10.1016/j.jinsphys.2006.09.014
- 1428 73. Telang A, Frame L, Brown MR. Larval feeding duration affects ecdysteroid levels and nutritional  
1429 reserves regulating pupal commitment in the yellow fever mosquito *Aedes aegypti* (Diptera:  
1430 Culicidae). *J Exp Biol.* 2007;210: 854–864. doi:10.1242/jeb.02715
- 1431 74. Padmanabha H, Lord CC, Lounibos LP. Temperature induces trade-offs between development  
1432 and starvation resistance in *Aedes aegypti* (L.) larvae. *Med Vet Entomol.* 2011;25: 445–453.  
1433 doi:10.1111/j.1365-2915.2011.00950.x
- 1434 75. Barrera R. Competition and resistance to starvation in larvae of container-inhabiting *Aedes*  
1435 mosquitoes. *Ecol Entomol.* 1996;21: 117–127. doi:10.1111/j.1365-2311.1996.tb01178.x
- 1436 76. Timmermann SE, Briegel H. Effect of plant, fungal and animal diets on mosquito development.  
1437 *Entomol Exp Appl.* 1996;80: 173–176. doi:10.1111/j.1570-7458.1996.tb00913.x
- 1438 77. Ahmad R, Chu W-LW-L, Lee H-LH-L, Phang S-MS-M. Effect of four chlorophytes on larval survival,  
1439 development and adult body size of the mosquito *Aedes aegypti*. *J Appl Phycol.* 2001;13: 369–  
1440 374. doi:10.1023/A:1017966802600
- 1441 78. Ahmad R, Chu WL, Ismail Z, Lee HL, Phang SM. Effect of ten chlorophytes on larval survival,  
1442 development and adult body size of the mosquito *Aedes aegypti*. *Southeast Asian J Trop Med*  
1443 *Public Heal.* 2004;35: 79–87. doi:10.1023/A:1017966802600
- 1444 79. Kim C-H, Muturi EJ. Relationship between leaf litter identity, expression of cytochrome P450  
1445 genes and life history traits of *Aedes aegypti* and *Aedes albopictus*. *Acta Trop.* Elsevier B.V.;  
1446 2012;122: 94–100. doi:10.1016/j.actatropica.2011.12.006
- 1447 80. Muturi EJ, Orindi BO, Kim CH. Effect of Leaf Type and Pesticide Exposure on Abundance of  
1448 Bacterial Taxa in Mosquito Larval Habitats. *PLoS One.* 2013;8. doi:10.1371/journal.pone.0071812
- 1449 81. Briegel H. Metabolic relationship between female body size, reserves, and fecundity of *Aedes*  
1450 *aegypti*. *J Insect Physiol.* 1990;36: 165–172. doi:10.1016/0022-1910(90)90118-Y
- 1451 82. Timmermann SE, Briegel H. Water depth and larval density affect development and accumulation  
1452 of reserves in laboratory populations of mosquitoes. *Bull Soc Vector Ecol.* 1993;18: 174–187.
- 1453 83. Briegel H. Physiological bases of mosquito ecology. *J Vector Ecol.* 2003;28: 1–11. Available:  
1454 <http://www.ncbi.nlm.nih.gov/pubmed/12831123>
- 1455 84. Telang A. Effects of larval nutrition on the endocrinology of mosquito egg development. *J Exp*  
1456 *Biol.* 2006;209: 645–655. doi:10.1242/jeb.02026
- 1457 85. Telang A, Peterson B, Frame L, Baker E, Brown MR. Analysis of molecular markers for  
1458 metamorphic competency and their response to starvation or feeding in the mosquito, *Aedes*  
1459 *aegypti* (Diptera: Culicidae). *J Insect Physiol.* Elsevier Ltd; 2010;56: 1925–1934.  
1460 doi:10.1016/j.jinsphys.2010.08.020
- 1461 86. Briegel H, Knuesel I, Timmerman SE, Knüsel I, Timmermann SE. *Aedes aegypti* size reserves  
1462 survival and flight potential. *J Vector Ecol.* 2001;26: 21–31.
- 1463 87. Price DP, Schilkey FD, Ulanov A, Hansen IA. Small mosquitoes, large implications: crowding and

- 1464 starvation affects gene expression and nutrient accumulation in *Aedes aegypti*. *Parasit Vectors*.  
1465 2015;8: 252. doi:10.1186/s13071-015-0863-9
- 1466 88. Sumanochitrapon W, Strickman D, Sithiprasasna R, Kittayapong P, Innis BL. Effect of size and  
1467 geographic origin of *Aedes aegypti* on oral infection with dengue-2 virus. *Am J Trop Med Hyg*.  
1468 1998;58: 283–286. doi:10.4269/ajtmh.1998.58.283
- 1469 89. Alto BW, Lounibos LP, Higgs S, Juliano SA. Larval competition differentially affects arbovirus  
1470 infection in *Aedes* mosquitoes. *Ecology*. 2005;86: 3279–3288. doi:10.1007/s10955-011-0269-  
1471 9.Quantifying
- 1472 90. Breaux JA, Schumacher MK, Juliano SA. What does not kill them makes them stronger: larval  
1473 environment and infectious dose alter mosquito potential to transmit filarial worms. *Proc R Soc B*  
1474 *Biol Sci*. 2014;281: 20140459–20140459. doi:10.1098/rspb.2014.0459
- 1475 91. Juliano SA, Ribeiro GS, Maciel-de-Freitas R, Castro MG, Codeço C, Lourenço-de-Oliveira R, et al.  
1476 She’s a femme fatale: Low-density larval development produces good disease vectors. *Mem Inst*  
1477 *Oswaldo Cruz*. 2014;109: 1070–1077. doi:10.1590/0074-02760140455
- 1478 92. Nasci RS, Mitchell CJ. Larval diet, adult size, and susceptibility of *Aedes aegypti* (Diptera,  
1479 Culicidae) to infection with Ross River virus. *J Med Entomol*. 1994;31: 123–126.  
1480 doi:10.1093/jmedent/31.1.123
- 1481 93. Alto BW, Lounibos LP, Mores CN, Reiskind MH. Larval competition alters susceptibility of adult  
1482 *Aedes* mosquitoes to dengue infection. *Proc R Soc B Biol Sci*. 2008; doi:10.1098/rspb.2007.1497
- 1483 94. Alto BW, Reiskind MH, Lounibos LP. Size alters susceptibility of vectors to dengue virus infection  
1484 and dissemination. *Am J Trop Med Hyg*. 2008; doi:79/5/688 [pii]
- 1485 95. Muturi EJ, Alto BW. Larval Environmental Temperature and Insecticide Exposure Alter *Aedes*  
1486 *aegypti* Competence for Arboviruses. *Vector-Borne Zoonotic Dis*. 2011;11: 1157–1163.  
1487 doi:10.1089/vbz.2010.0209
- 1488 96. Muturi EJ, Costanzo K, Kesavaraju B, Alto BW. Can Pesticides and Larval Competition Alter  
1489 Susceptibility of *Aedes* Mosquitoes (Diptera: Culicidae) to Arbovirus Infection? *J Med Entomol*.  
1490 2011; doi:10.1603/ME10213
- 1491 97. Muturi EJ, Kim CH, Alto BW, Berenbaum MR, Schuler MA. Larval environmental stress alters  
1492 *Aedes aegypti* competence for Sindbis virus. *Trop Med Int Heal*. 2011;16: 955–964.  
1493 doi:10.1111/j.1365-3156.2011.02796.x
- 1494 98. Steinwascher K. Host-parasite interaction as a potential population-regulating mechanism.  
1495 *Ecology*. 1979;60: 884–890. doi:10.2307/1936856
- 1496 99. Steinwascher K. Competition for two resources. *Oecologia*. 1981;49: 415–418.  
1497 doi:10.1007/BF00347609
- 1498 100. Rubenstein DI. Individual Variation and Competition in the Everglades Pygmy Sunfish. *J Anim*  
1499 *Ecol*. 1981;50: 337–350.
- 1500 101. Dye C. Competition amongst larval *Aedes aegypti*: the role of interference. *Ecol Entomol*. 1984;9:



- 1501 355–357. doi:10.1111/j.1365-2311.1984.tb00859.x
- 1502 102. Surtees G. Influence of Larval Population Density on Fluctuation in Mosquito Numbers. *Nature*.  
1503 1959;183: 269–270.
- 1504 103. Lopez C, Martinez de Ibanez M, Machado-Allison CE. Densidad Larval y Dinamica Poblacional de  
1505 *Aedes aegypti* (L.) en Condiciones de Laboratorio. *Acta Cient Venezolana*. 1976;27: 317–320.  
1506 doi:10.1016/j.celrep.2011.1011.1001.7.
- 1507 104. Reiskind MH, Lounibos LP. Effects of intraspecific larval competition on adult longevity in the  
1508 mosquitoes *Aedes aegypti* and *Aedes albopictus*. *Med Vet Entomol*. 2009;23: 62–68.  
1509 doi:10.1111/j.1365-2915.2008.00782.x
- 1510 105. Muturi EJ, Blackshear M, Montgomery A. Temperature and density-dependent effects of larval  
1511 environment on *Aedes aegypti* competence for an alphavirus. *J Vector Ecol*. 2012;37: 154–161.  
1512 doi:10.1111/j.1948-7134.2012.00212.x
- 1513 106. Alto BW, Bettinardi DJ, Ortiz S. Interspecific larval competition differentially impacts adult  
1514 survival in dengue vectors. *J Med Entomol*. 2015;52: 163–170. doi:10.1093/jme/tju062
- 1515 107. Dutra HLC, Da Silva VL, Da Rocha Fernandes M, Logullo C, Maciel-De-Freitas R, Moreira LA. The  
1516 influence of larval competition on Brazilian *Wolbachia*-infected *Aedes aegypti* mosquitoes.  
1517 *Parasites and Vectors*. *Parasites & Vectors*; 2016;9: 1–15. doi:10.1186/s13071-016-1559-5
- 1518 108. Joy TK, Arik AJ, Corby-Harris V, Johnson AA, Riehle MA. The impact of larval and adult dietary  
1519 restriction on lifespan, reproduction and growth in the mosquito *Aedes aegypti*. *Exp Gerontol*.  
1520 2010;45: 685–690. doi:10.1016/j.jmb.2008.10.054.The
- 1521 109. Serpa LLN, Kakitani I, Voltolini JC. Competição entre larvas de *Aedes aegypti* e *Aedes albopictus*  
1522 em laboratório. *Rev Soc Bras Med Trop*. 2008;41: 479–484. doi:10.1590/S0037-  
1523 86822008000500009
- 1524 110. Mitchell-Foster K, Ma BO, Warsame-Ali S, Logan C, Rau ME, Lowenberger C. The influence of  
1525 larval density, food stress, and parasitism on the bionomics of the dengue vector *Aedes aegypti*  
1526 (Diptera: Culicidae): implications for integrated vector management. *J Vector Ecol*. 2012;37: 221–  
1527 229. doi:10.1111/j.1948-7134.2012.00220.x
- 1528 111. Fader JE. The Importance of Interspecific Interactions on the Present Range of the Invasive  
1529 Mosquito *Aedes albopictus* (Diptera: Culicidae) and Persistence of Resident Container Species in  
1530 the United States. *J Med Entomol*. 2016;53: 992–1001. doi:10.1093/jme/tjw095
- 1531 112. Ponnusamy L, Böröczky K, Wesson DM, Schal C, Apperson CS. Bacteria stimulate hatching of  
1532 yellow fever mosquito eggs. *PLoS One*. 2011;6: 1–10. doi:10.1371/journal.pone.0024409
- 1533 113. Wong J, Stoddard ST, Astete H, Morrison AC, Scott TW. Oviposition site selection by the dengue  
1534 vector *Aedes aegypti* and its implications for dengue control. *PLoS Negl Trop Dis*. 2011;5.  
1535 doi:10.1371/journal.pntd.0001015
- 1536 114. O’Neal PA, Juliano SA. Seasonal variation in competition and coexistence of *Aedes* mosquitoes:  
1537 Stabilizing effects of egg mortality or equalizing effects of resources? *J Anim Ecol*. 2013;82: 256–  
1538 265. doi:10.1111/j.1365-2656.2012.02017.x

- 1539 115. Perez MH, Noriega FG. *Aedes aegypti* pharate 1st instar quiescence: A case for anticipatory  
1540 reproductive plasticity. *J Insect Physiol.* 2013;59: 318–324. doi:10.1016/j.jinsphys.2012.12.007
- 1541 116. Byttebier B, De Majo MS, Fischer S. Hatching Response of *Aedes aegypti* (Diptera: Culicidae) Eggs  
1542 at Low Temperatures: Effects of Hatching Media and Storage Conditions. *J Med Entomol.*  
1543 2014;51: 97–103. doi:10.1603/ME13066
- 1544 117. Faull KJ, Williams CR. Intraspecific variation in desiccation survival time of *Aedes aegypti* (L.)  
1545 mosquito eggs of Australian origin. *J Vector Ecol.* 2015;40. doi:10.1111/jvec.12167
- 1546 118. Rey JR, Lounibos P, Lounibos P. Ecology of *Aedes aegypti* and *Aedes albopictus* in America and  
1547 disease transmission. *Biomédica.* 2015;35: 1–6. doi:10.7705/biomedica.v35i2.2514
- 1548 119. Diniz DFA, De Albuquerque CMR, Oliva LO, De Melo-Santos MAV, Ayres CFJ. Diapause and  
1549 quiescence: Dormancy mechanisms that contribute to the geographical expansion of mosquitoes  
1550 and their evolutionary success. *Parasites and Vectors.* *Parasites & Vectors;* 2017;10: 1–13.  
1551 doi:10.1186/s13071-017-2235-0
- 1552 120. Yates MG. The biology of the tree-hole breeding mosquito *Aedes geniculatus* (Olivier) (Diptera:  
1553 Culicidae) in southern England. *Bull Entomol Res.* 1979;69: 611–628.  
1554 doi:10.1017/S0007485300020162
- 1555 121. Armbruster P, Hutchinson RA. Pupal Mass and Wing Length as Indicators of Fecundity in *Aedes*  
1556 *albopictus* and *Aedes geniculatus* (Diptera: Culiciae). *J Med Entomol.* 2002;39: 699–704.  
1557 doi:10.1603/0022-2585-39.4.699
- 1558 122. Skiff JJ, Yee DA. Behavioral Differences Among Four Co-occurring Species of Container Mosquito  
1559 Larvae: Effects of Depth and Resource Environments. *J Med Entomol.* 2014;51: 375–381.  
1560 doi:10.1603/ME13159
- 1561 123. Yee D a, Kneitel JM, Juliano S a. Environmental correlates of abundances of mosquito species and  
1562 stages in discarded vehicle tires. *J Med Entomol.* 2010; doi:10.1603/033.047.0107
- 1563 124. Yee DA, Kesavaraju B, Juliano SA. Larval feeding behavior of three co-occurring species of  
1564 container mosquitoes. *J vector Ecol.* 2004;29: 315–322.
- 1565 125. Alto BW, Griswold MW, Lounibos LP. Habitat complexity and sex-dependent predation of  
1566 mosquito larvae in containers. *Oecologia.* 2005;146: 300–310. doi:10.1007/s00442-005-0198-x
- 1567 126. Alto BW, Yanoviak SP, Lounibos LP, Drake BG. Effects of Elevated Atmospheric Co<sub>2</sub> on Water  
1568 Chemistry and Mosquito (Diptera: Culicidae) Growth Under Competitive Conditions in Container  
1569 Habitats. *Florida Entomol.* 2005;88: 372–382. doi:10.1653/0015-  
1570 4040(2005)88[372:EOEACO]2.0.CO;2
- 1571 127. Costanzo KS, Mormann K, Juliano S a. Asymmetrical competition and patterns of abundance of  
1572 *Aedes albopictus* and *Culex pipiens* (Diptera: Culicidae). *J Med Entomol.* 2005;42: 559–570.  
1573 doi:10.1016/j.bbi.2008.05.010
- 1574 128. Bevins SN. Timing of resource input and larval competition between invasive and native  
1575 container-inhabiting mosquitoes (Diptera: Culicidae). *J Vector Ecol.* 2007; doi:10.3376/1081-  
1576 1710(2007)32[252:TORIAL]2.0.CO;2

- 1577 129. Leisnham PT, Juliano SA. Interpopulation differences in competitive effect and response of the  
1578 mosquito *Aedes aegypti* and resistance to invasion by a superior competitor. *Oecologia*.  
1579 2010;164: 221–230. doi:10.1007/s00442-010-1624-2
- 1580 130. Reiskind MH, Zarrabi AA. The importance of an invasive tree fruit as a resource for mosquito  
1581 larvae. *J Vector Ecol*. 2011;36: 197–203. doi:10.1111/j.1948-7134.2011.00157.x
- 1582 131. Armistead JS, Nishimura N, Arias JR, Lounibos LP. Community Ecology of Container Mosquitoes  
1583 (Diptera: Culicidae) in Virginia Following Invasion by *Aedes japonicus*; *J Med*  
1584 *Entomol*. 2012;49: 1318–1327. doi:10.1603/ME11261
- 1585 132. Leisnham PT, Juliano SA. Impacts of climate, land use, and biological invasion on the ecology of  
1586 immature aedes mosquitoes: Implications for la crosse emergence. *Ecohealth*. 2012;9: 217–228.  
1587 doi:10.1007/s10393-012-0773-7
- 1588 133. van Uitregt VO, Hurst TP, Wilson RS. Reduced size and starvation resistance in adult mosquitoes,  
1589 *Aedes notoscriptus*, exposed to predation cues as larvae. *J Anim Ecol*. 2012;81: 108–115.  
1590 doi:10.1111/j.1365-2656.2011.01880.x
- 1591 134. Walsh RK, Bradley C, Apperson CS, Gould F. An experimental field study of delayed density  
1592 dependence in natural populations of *aedes albopictus*. *PLoS One*. 2012;7: 1–7.  
1593 doi:10.1371/journal.pone.0035959
- 1594 135. Johnson BJ, Sukhdeo MVK. Successional mosquito dynamics in surrogate treehole and ground-  
1595 container habitats in the northeastern United States: Where does *Aedes albopictus* fit in? *J*  
1596 *Vector Ecol*. 2013;38. doi:10.1111/j.1948-7134.2013.12023.x
- 1597 136. Medley KA, Jenkins DG, Hoffman EA. Human-aided and natural dispersal drive gene flow across  
1598 the range of an invasive mosquito. *Mol Ecol*. 2015;24. doi:10.1111/mec.12925
- 1599 137. Wasserberg G, Bailes N, Davis C, Yeoman K. Hump-shaped density-dependent regulation of  
1600 mosquito oviposition site-selection by conspecific immature stages: Theory, field test with *Aedes*  
1601 *albopictus*, and a meta-analysis. *PLoS One*. 2014;9: 1–15. doi:10.1371/journal.pone.0092658
- 1602 138. Costanzo KS, Schelble S, Jerz K, Keenan M. The effect of photoperiod on life history and blood-  
1603 feeding activity in *Aedes albopictus* and *Aedes aegypti* (Diptera: Culicidae). *J Vector Ecol*.  
1604 2015;40: 164–171. doi:10.1111/jvec.12146
- 1605 139. Dieng H, Hui OS, Hassan AA, Abang F, Ghani IA, Satho T, et al. Changes in the biting activity of a  
1606 dengue vector relative to larval and adult nutritional histories: Implications for preventive  
1607 measures. *J Asia Pac Entomol*. 2015;18: 507–513. doi:10.1016/j.aspen.2015.06.006
- 1608 140. Murrell EG, Noden BH, Juliano SA. Contributions of temporal segregation, oviposition choice, and  
1609 non-additive effects of competitors to invasion success of *Aedes japonicus* (Diptera: Culicidae) in  
1610 North America. *Biol Invasions*. 2015;17. doi:10.1007/s10530-014-0824-9
- 1611 141. Bara J, Rapti Z, Cáceres CE, Muturi EJ. Effect of larval competition on extrinsic incubation period  
1612 and vectorial capacity of *Aedes albopictus* for dengue virus. *PLoS One*. 2015;10: 1–18.  
1613 doi:10.1371/journal.pone.0126703
- 1614 142. Muturi EJ, Gardner AM, Bara JJ. Impact of an Alien Invasive Shrub on Ecology of Native and Alien

- 1615 Invasive Mosquito Species (Diptera: Culicidae). *Environ Entomol.* 2015;44: 1308–1315.  
1616 doi:10.1093/ee/nvv121
- 1617 143. Costanzo KS, Dahan RA, Radwan D. Effects of photoperiod on population performance and  
1618 sexually dimorphic responses in two major arbovirus mosquito vectors, *Aedes albopictus* and  
1619 *Aedes aegypti* (Diptera: Culicidae). *Int J Trop Insect Sci.* 2016;36: 177–187.  
1620 doi:10.1017/S1742758416000163
- 1621 144. Davis TJ, Kline DL, Kaufman PE. Assessment of *Aedes albopictus* (Skuse) (Diptera: Culicidae) clutch  
1622 size in wild and laboratory populations. *J Vector Ecol.* 2016;41: 11–17. doi:10.1111/jvec.12188
- 1623 145. Yee DA. What Can Larval Ecology Tell Us about the Success of *Aedes albopictus* (Diptera:  
1624 Culicidae) Within the United States? *J Med Entomol.* 2016;53: 1002–1012.  
1625 doi:10.1093/jme/tjw046
- 1626 146. Hawley WA. The Effect of Larval Density on Adult Longevity of a Mosquito, *Aedes sierrensis* :  
1627 Epidemiological Consequences. *J Anim Ecol.* 1985;54: 955–964. doi:10.2307/4389
- 1628 147. Fisher IJ, Bradshaw WE, Kammeyer C. Fitness and Its Correlates Assessed by Intra- And  
1629 Interspecific Interactions among Tree- Hole Mosquitoes. *J Anim Ecol.* 1990;59: 819–829.
- 1630 148. Broadie KS, Bradshaw WE. Mechanisms of interference competition in the western tree-hole  
1631 mosquito, *Aedes sierrensis*. *Ecological Entomology.* 1991. pp. 145–154. doi:10.1111/j.1365-  
1632 2311.1991.tb00203.x
- 1633 149. Colwell AE, Woodward DL, Anderson NL. Environmental-factors affecting the western treehole  
1634 mosquito (*aedes sierrensis*). *Northwest Sci.* 1995;69: 151–162.
- 1635 150. Kleckner CA, Hawley WA, Bradshaw WE, Christina M, Holzapfel CM, Fisher IJANJ. Protandry in  
1636 *Aedes Sierrensis* : The Significance of Temporal Variation in Female Fecundity. *Ecology.* 1995;76:  
1637 1242–1250. doi:10.2307/1940931
- 1638 151. Eisenberg JNS, Washburn JO, Schreiber SJ. Generalist Feeding Behaviors of *Aedes sierrensis*  
1639 Larvae and Their Effects on Protozoan Populations. *Ecology.* 2000;81: 921–935.
- 1640 152. Mercer DR, Schoergendorfer A, Vandyke R. Sexual differences in larval molting rates in a  
1641 protandrous mosquito (Diptera : Culicidae) species, *Aedes sierrensis*. *J Med Entomol.* 2008;  
1642 doi:10.1603/0022-2585(2008)45
- 1643 153. Kesavaraju B, Leisnham PT, Keane S, Delisi N, Pozatti R. Interspecific competition between *aedes*  
1644 *albopictus* and *A. sierrensis*: Potential for competitive displacement in the Western United  
1645 States. *PLoS One.* 2014; doi:10.1371/journal.pone.0089698
- 1646 154. Merritt RW, Mortland MM, Gersabeck EF, Ross DH. X-ray diffraction analysis of particles ingested  
1647 by filter-feeding animals. *Entomol Exp Appl.* 1978;24: 27–34.
- 1648 155. Carpenter SR. Stemflow chemistry: effects on population dynamics of detritivorous mosquitos in  
1649 tree-hole ecosystems. *Oecologia.* 1982;53: 1–6. doi:10.1007/bf00377128
- 1650 156. Fish D, Carpenter SR. Leaf Litter and Larval Mosquito Dynamics in Tree-Hole Ecosystems. *Ecology.*  
1651 1982;63: 283–288. doi:10.2307/1938943

- 1652 157. Livdahl TP. Competition within and between hatching cohorts of a treehole mosquito. *Ecology*.  
1653 1982;63: 1751–1760. doi:10.2307/1940117
- 1654 158. Carpenter SR. Experimental test of the pupation window model for development of detritivorous  
1655 insects. *Ecol Modell*. 1984;23: 257–264. doi:10.1016/0304-3800(84)90104-2
- 1656 159. Grimstad PR, Haramis LD. *Aedes triseriatus* (Diptera: Culicidae) and La Cross Virus III . Enhanced  
1657 oral transmission by nutrition-deprived mosquitoes. *J Med Entomol*. 1984;21: 249–256.
- 1658 160. Livdahl TP, Koenekoop RK. The nature of egg hatching in *Aedes triseriatus*: ecological implications  
1659 and evolutionary consequences. *Ecology of mosquitoes: proceedings of a workshop, University of*  
1660 *Florida, Welaka, Florida, 9-12 January, 1984*. 1985. pp. 439–458.
- 1661 161. Hard JJ, Bradshaw WE, Malarkey DJ. Resource- and Density-Dependent Development in Tree-  
1662 Hole Mosquitoes. *Oikos*. 1989;54: 137–144.
- 1663 162. Ho BC, Ewert A, Chew LM. Interspecific competition among *Aedes aegypti*, *Ae. albopictus*, and  
1664 *Ae. triseriatus* (Diptera: Culicidae): larval development in mixed cultures. *J Med Entomol*.  
1665 1989;26: 615–623. doi:10.1093/jmedent/26.6.615
- 1666 163. Juliano SA. Geographic Variation in Vulnerability to Predation and Starvation in Larval Treehole  
1667 Mosquitoes. *Oikos*. 1989;56: 99–108.
- 1668 164. Grimstad PR, Walker ED. *Aedes triseriatus* (Diptera: Culicidae) and La Crosse virus. IV. Nutritional  
1669 deprivation of larvae affects the adult barriers to infection and transmission. *J Med Entomol*.  
1670 1991;28: 378–386. doi:10.1093/jmedent/28.3.378
- 1671 165. Paulson SL, Hawley WA. Effect of body size on the vector competence of field and laboratory  
1672 populations of *Aedes triseriatus* for La Crosse virus. *J Am Mosq Control Assoc*. 1991;7: 170–175.
- 1673 166. Walker ED, Merritt RW. Behavior of larval *Aedes triseriatus* (Diptera: Culicidae). *J Med Entomol*.  
1674 1991;28: 581–589. doi:10.1093/jmedent/28.5.581
- 1675 167. Juliano SA, Hechtel LJ, Waters JR. Behavior and Risk of Predation in Larval Tree Hole Mosquitoes :  
1676 Effects of Hunger and Population History of Predation. *Oikos*. 1993;68: 229–241.
- 1677 168. Lounibos LP, Nishimura N, Escher RL. Fitness of a treehole mosquito: influences of food type and  
1678 predation. *Oikos*. 1993;66: 114–118. doi:10.2307/3545203
- 1679 169. Leonard PM, Juliano SA. Effect of leaf litter and density on fitness and population performance of  
1680 the hole mosquito *Aedes triseriatus*. *Ecol Entomol*. 1995;20: 125–136. doi:10.1111/j.1365-  
1681 2311.1995.tb00438.x
- 1682 170. Mahmood F, Crans WJ, Savur NS. Larval Competition in *Aedes triseriatus* (Diptera: Culicidae):  
1683 Effects of Density on Size, Growth, Sex Ratio, and Survival. *J Vector Ecol*. 1997;22: 90–94.  
1684 Available:  
1685 <http://www.ncbi.nlm.nih.gov/pubmed/21485358>  
1686 <http://www.ncbi.nlm.nih.gov/pubmed/9221744>
- 1687 171. Walker ED, Merritt RW, Kaufman MG, Ayres MP, Riedel MH. Effects of variation in quality of leaf  
1688 detritus on growth of the eastern tree-hole mosquito, *Aedes triseriatus* (Diptera: Culicidae). *Can J*

- 1689 Zool. 1997;75: 706–718. doi:10.1139/z97-091
- 1690 172. Edgerly JS, Willey MS, Livdahl T. Intraguild predation among larval treehole mosquitoes, *Aedes*  
1691 *albopictus*, *Ae. aegypti*, and *Ae. triseriatus* (Diptera: Culicidae), in laboratory microcosms. *J Med*  
1692 *Entomol.* 1999;36: 394–399. doi:10.1093/jmedent/36.3.394
- 1693 173. Teng HJ, Apperson CS. Development and survival of immature *Aedes albopictus* and *Aedes*  
1694 *triseriatus* (Diptera: Culicidae) in the laboratory: effects of density, food, and competition on  
1695 response to temperature. *J Med Entomol.* 2000;37: 40–52. doi:10.1603/0022-2585-37.1.40
- 1696 174. Juliano SA, Gravel ME. Predation and the evolution of prey behavior: an experiment with tree  
1697 hole mosquitoes. *Behav Ecol.* 2002;13: 301–311. doi:10.1093/beheco/13.3.301
- 1698 175. Alto BW. Interspecific Larval Competition Between Invasive *Aedes japonicus* and Native *Aedes*  
1699 *triseriatus* (Diptera: Culicidae) and Adult Longevity. *J Med Entomol.* 2011;48: 232–242.  
1700 doi:10.1603/ME09252
- 1701 176. Westby KM, Juliano SA. Simulated Seasonal Photoperiods and Fluctuating Temperatures Have  
1702 Limited Effects on Blood Feeding and Life History in *Aedes triseriatus* (Diptera: Culicidae). *J Med*  
1703 *Entomol.* 2015;52. doi:10.1093/jme/tjv116
- 1704 177. Walker ED, Lawson DL, Merritt RW, Morgan WT, Lawson DL, Klug MJ. Nutrient Dynamics ,  
1705 Bacterial Populations , and Mosquito Productivity in Tree Hole Ecosystems and Microcosms.  
1706 *Ecology.* 2016;72: 1529–1546. doi:10.2307/1940953
- 1707 178. Pelz-Stelinski K, Kaufman MG, Walker ED. Beetle (Coleoptera: Scirtidae) Facilitation of Larval  
1708 Mosquito Growth in Tree Hole Habitats is Linked to Multitrophic Microbial Interactions. *Microb*  
1709 *Ecol.* 2011;62: 690–703. doi:10.1007/s00248-011-9872-1
- 1710 179. Pelz-Stelinski KS, Walker ED, Kaufman MG. Senescent leaf exudate increases mosquito survival  
1711 and microbial activity. *Ecol Entomol.* 2010;35: 329–340. doi:10.1111/j.1365-2311.2010.01183.x
- 1712 180. Subra R. The regulation of preimaginal populations of *Aedes aegypti* L. (Diptera: Culicidae) on the  
1713 Kenya coast. I. Preimaginal population dynamics and the role of human behaviour. *Ann Trop Med*  
1714 *Parasitol.* 1983;77: 195–201. doi:10.1080/00034983.1983.11811697
- 1715 181. Subra R, Mouchet J. The regulation of preimaginal populations of *Aedes aegypti* (L.) (Diptera:  
1716 Culicidae) on the Kenya coast. II. Food as a main regulatory factor. *Ann Trop Med Parasitol.*  
1717 1984;78: 63–70. doi:10.1080/00034983.1984.11811774
- 1718 182. Arrivillaga J, Barrera R. Food as a limiting factor for *Aedes aegypti* in water-storage containers. *J*  
1719 *Vector Ecol.* 2004;29: 11–20.
- 1720 183. Tun-Lin W, Burkot TR, Kay BH. Effects of temperature and larval diet on development rates and  
1721 survival of the dengue vector *Aedes aegypti* in north Queensland, Australia. *Med Vet Entomol.*  
1722 2000;14: 31–37. doi:10.1046/j.1365-2915.2000.00207.x
- 1723 184. Santana-Martínez JC, Molina J, Dussán J. Asymmetrical competition between *Aedes aegypti* and  
1724 *Culex quinquefasciatus* (diptera: Culicidae) coexisting in breeding sites. *Insects.* 2017;8.  
1725 doi:10.3390/insects8040111

- 1726 185. Helinski MEH, Harrington LC. Male Mating History and Body Size Influence Female Fecundity and  
1727 Longevity of the Dengue Vector *Aedes aegypti*. *J Med Entomol.* 2011;48: 202–211.  
1728 doi:10.1603/ME10071
- 1729 186. Nasci RS. The size of emerging and host-seeking *Aedes aegypti* and the relation of size to blood-  
1730 feeding success in the field. *J Am Mosq Control Assoc.* 1986;2: 61–62. doi:10.1101/gr.3715005
- 1731 187. Yeap HL, Endersby NM, Johnson PH, Ritchie SA, Hoffmann AA. Body size and wing shape  
1732 measurements as quality indicators of *aedes aegypti* mosquitoes destined for field release. *Am J*  
1733 *Trop Med Hyg.* 2013;89: 78–92. doi:10.4269/ajtmh.12-0719
- 1734 188. Rückert C, Weger-Lucarelli J, Garcia-Luna SM, Young MC, Byas AD, Murrieta RA, et al. Impact of  
1735 simultaneous exposure to arboviruses on infection and transmission by *Aedes aegypti*  
1736 mosquitoes. *Nat Commun.* 2017;8. doi:10.1038/ncomms15412
- 1737 189. Guagliardo SA, Barboza JL, Morrison AC, Astete H, Vazquez-Prokopec G, Kitron U. Patterns of  
1738 Geographic Expansion of *Aedes aegypti* in the Peruvian Amazon. *PLoS Negl Trop Dis.* 2014;  
1739 doi:10.1371/journal.pntd.0003033
- 1740 190. Ponlawat A, Harrington LC. Age and body size influence male sperm capacity of the dengue  
1741 vector *Aedes aegypti* (Diptera: Culicidae). *J Med Entomol.* 2007;44: 422–426. doi:10.1603/0022-  
1742 2585(2007)44[422:AABSIM]2.0.CO;2
- 1743 191. De Jesus CE, Reiskind MH. The importance of male body size on sperm uptake and usage, and  
1744 female fecundity in *Aedes aegypti* and *Aedes albopictus*. *Parasites and Vectors. Parasites &*  
1745 *Vectors;* 2016;9: 1–7. doi:10.1186/s13071-016-1734-8
- 1746 192. Koenraad CJM, Kormaksson M, Harrington LC. Effects of inbreeding and genetic modification on  
1747 *Aedes aegypti* larval competition and adult energy reserves. *Parasites and Vectors.* 2010;3: 1–21.  
1748 doi:10.1186/1756-3305-3-92
- 1749 193. de Lourdes Muñoz M, Mercado-Curiel RF, Diaz-Badillo A, Pérez Ramirez G, Black WC. Gene flow  
1750 pattern among *Aedes aegypti* populations in Mexico. *J Am Mosq Control Assoc.* 2013;  
1751 doi:10.2987/12-6267R.1

1752

1753

## 1754 Supporting information

1755 S1 Table. Sample size (number of replicates analyzed) by treatment.

1756 S2 Table. Significant correlations between composite scores and variables with MANOVA significance  
1757 levels and R squared by contrast.

1758 S3 Table. Mean squares, significance levels, and r squared values by single DF contrast for each of the 7  
1759 dependent variables.

1760 S4 Table. Survival (Arcsin transformation of percent survival) by treatment.

1761 S5 Table. Prime female mass at pupation (mg) by treatment.

1762 S6 Table. Average female mass at pupation (mg) by treatment.

1763 S7 Table. Prime male mass at pupation (mg) by treatment.

1764 S8 Table. Average male mass at pupation (mg) by treatment.

1765 S9 Table. Prime male age at pupation (days) by treatment.

1766 S10 Table. Prime female age at pupation (days) by treatment.
